# Supplementary material for: Dysbiosis by Eradication of Helicobacter pylori Infection Associated with Follicular Gastropathy and Pangastropathy
Source: MDPI journal article supplement (doi:10.3390/microorganisms11112748), 2023-11-10
Supplement: s1 [file s1]

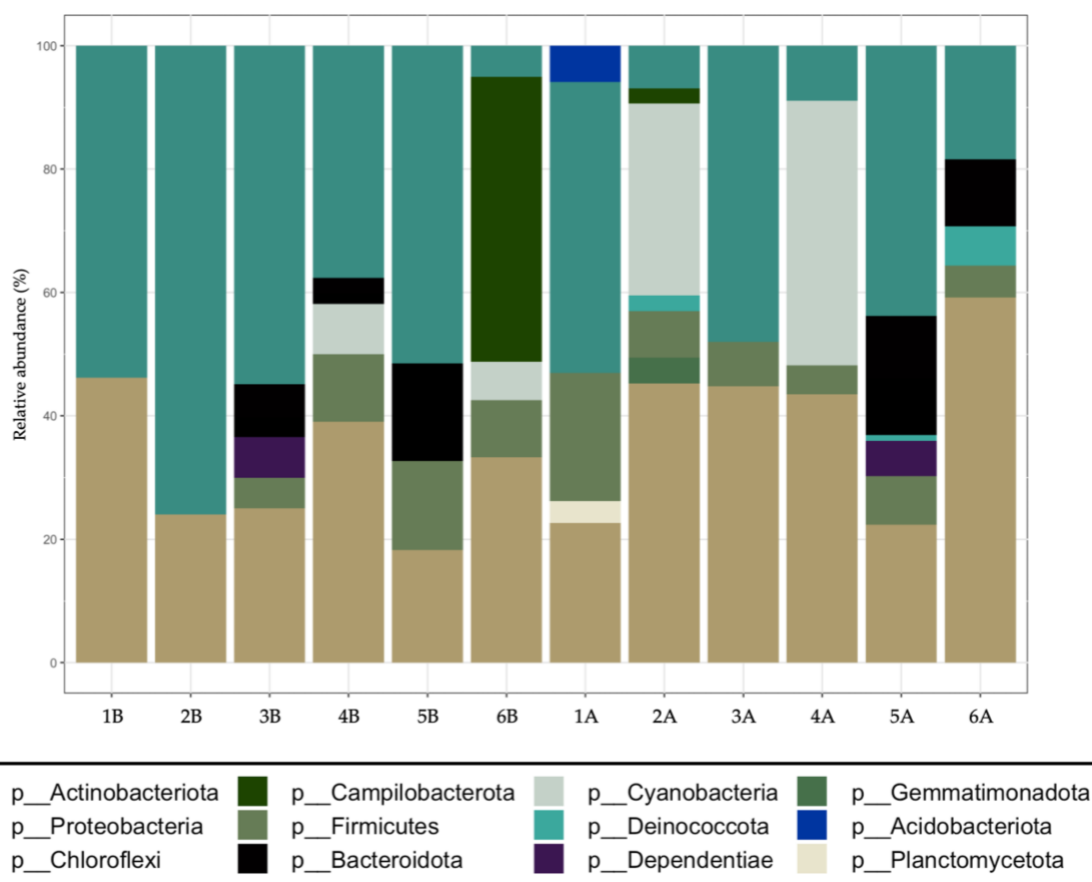

**Supplementary Figure S3. Metagenomic profile at Phylum level of patients diagnosed with follicular gastropathy and pangastropathy initially associated to infection with *H. pylori*. B: Pre-treatment patient; A: Posttreatment patient.**
