# Supplementary material for: Dysbiosis by Eradication of Helicobacter pylori Infection Associated with Follicular Gastropathy and Pangastropathy
Source: MDPI journal article supplement (doi:10.3390/microorganisms11112748), 2023-11-10
Supplement: s1 [file s1]

**Supplementary Table S4. Frequency of genotypes in *H. pylori* strains isolated from the study subjects before the administration of STT.**

| Patient | Gene                    | Frequency (%) | Genotype                                               | Frequency (%) |
|---------|-------------------------|---------------|--------------------------------------------------------|---------------|
| 1B      | <i>cagA</i> +           | 81            | <i>cagA</i> + <i>vacAs1</i> + <i>m1</i> + <i>m2</i> +* | 54            |
|         | <i>s1</i> +             | 100           | <i>cagA</i> + <i>vacAs1</i> + <i>m1</i> - <i>m2</i> -  | 9             |
|         | <i>m1</i> +             | 27            | <i>cagA</i> + <i>vacAs1</i> + <i>m1</i> +*             | 18            |
|         | <i>m1</i> + <i>m2</i> + | 54            | <i>cagA</i> - <i>vacAs1</i> + <i>m1</i> - <i>m2</i> -  | 9             |
|         | <i>m1</i> - <i>m2</i> - | 18            | <i>cagA</i> - <i>vacAs1</i> + <i>m1</i> +*             | 9             |
| 5B      | <i>cagA</i> +           | 90            | <i>cagA</i> + <i>vacAs1</i> + <i>m1</i> + <i>m2</i> +  | 50            |
|         | <i>s1</i> +             | 70            |                                                        |               |
|         | <i>s2</i> +             | 30            | <i>cagA</i> + <i>vacAs1</i> + <i>m2</i> +              | 20            |
|         | <i>m1</i> +             | 10            | <i>cagA</i> + <i>vacAs2</i> + <i>m1</i> + <i>m2</i> +* | 10            |
|         | <i>m2</i> +             | 30            | <i>cagA</i> + <i>vacAs2</i> + <i>m1</i> +              | 10            |
|         | <i>m1</i> + <i>m2</i> + | 60            | <i>cagA</i> - <i>vacAs2</i> + <i>m2</i> +              | 10            |
| 6B      | <i>cagA</i> +           | 66            | <i>cagA</i> + <i>vacAs1</i> + <i>m1</i> +              | 58            |
|         | <i>s1</i> +             | 92            | <i>cagA</i> + <i>vacAs2</i> + <i>m1</i> + <i>m2</i>    | 8             |
|         | <i>m1</i> +             | 66            | <i>cagA</i> - <i>vacAs1</i> + <i>m1</i> + <i>m2</i> +  | 26            |
|         | <i>m1</i> + <i>m2</i> + | 34            | <i>cagA</i> - <i>vacAs1</i> + <i>m1</i> +              | 8             |

**B:** Pre-treatment patient.

\*: Genotypes observed in more than one patient.

*cagA*: cytotoxin CagA gene; *vacA*: vacuolating cytotoxin VacA gene.

*s*: signal-sequence region (*s*-region); *m*: mid-region (*m*-region).
