# Supplementary material for: Dysbiosis by Eradication of Helicobacter pylori Infection Associated with Follicular Gastropathy and Pangastropathy
Source: MDPI journal article supplement (doi:10.3390/microorganisms11112748), 2023-11-10
Supplement: s1 [file s1]

**Supplementary Table S1. Histological findings of the FFPE gastric biopsies for evaluation of the presence of *C. acnes* and *H. pylori*.**

| Patient | Clinical diagnosis                                                                                                                                    |
|---------|-------------------------------------------------------------------------------------------------------------------------------------------------------|
| 1       | Gastritis                                                                                                                                             |
| 2       | Mild chronic gastritis in gastric fundus and corpus.<br>Nodular gastritis in gastric antrum.                                                          |
| 3       | Inactive follicular gastritis. No atrophy                                                                                                             |
| 4       | Gastritis                                                                                                                                             |
| 5       | Mild gastritis                                                                                                                                        |
| 6       | Mild chronic gastritis. No atrophy.                                                                                                                   |
| 7       | Reactive gastritis in gastric antrum. Billiard reflux.                                                                                                |
| 8       | Gastric fundus and antrum with no significative alterations.                                                                                          |
| 9       | Mild chronic gastritis. No atrophy.                                                                                                                   |
| 10      | Superficial gastritis in gastric fundus and corpus. Mild gastritis.<br>Mild atrophy in gastric antrum.                                                |
| 11      | Superficial gastritis. No atrophy.                                                                                                                    |
| 12      | Minimal gastritis in gastric antrum.                                                                                                                  |
| 13      | Gastritis in gastric antrum. Moderate activity<br>Superficial gastritis in gastric corpus. No activity.                                               |
| 14      | Gastritis in gastric antrum. Moderate activity. No atrophy.                                                                                           |
| 15      | Chronic gastritis associated to <i>H. pylori</i> infection. Moderate activity.                                                                        |
| 16      | Superficial chronic gastritis in gastric fundus, corpus and antrum. No activity.                                                                      |
| 17      | Gastritis in gastric antrum. Mild atrophy.                                                                                                            |
| 18      | Mild gastritis in gastric fundus and corpus. No activity.<br>Follicular active gastritis in gastric antrum, associated to <i>H. pylori</i> infection. |
| 19      | Minimal histologic alterations in gastric fundus, corpus and antrum.                                                                                  |
| 20      | Esophagitis                                                                                                                                           |
| 21      | Minimal histologic alterations in gastric antrum.                                                                                                     |
| 22      | Enteropathy                                                                                                                                           |
| 23      | Chronic follicular gastritis associated to <i>H. pylori</i> infection. No activity.                                                                   |
| 24      | Follicular gastropathy in gastric corpus associated to <i>H. pylori</i> infection.                                                                    |
| 25      | Follicular pangastropathy associated to <i>H. pylori</i> infection.                                                                                   |
| 26      | Follicular gastropathy in gastric corpus associated to <i>H. pylori</i> infection.                                                                    |
| 27      | Follicular gastropathy in gastric corpus associated to <i>H. pylori</i> infection.                                                                    |
| 28      | Follicular pangastropathy associated to <i>H. pylori</i> infection.                                                                                   |
| 29      | Follicular pangastropathy associated to <i>H. pylori</i> infection.                                                                                   |
| 30 – 40 | Intestinal metaplasia                                                                                                                                 |
