# Supplementary material for: Dysbiosis by Eradication of Helicobacter pylori Infection Associated with Follicular Gastropathy and Pangastropathy
Source: MDPI journal article supplement (doi:10.3390/microorganisms11112748), 2023-11-10
Supplement: s1 [file s1]

**Supplementary Table S3. Frequency of resistance in the *H. pylori* subcultures.**

| Antibiotic | Interpretative categories | MIC breakpoints (µg/mL) | Frequency (%) |
|------------|---------------------------|-------------------------|---------------|
| CLR        | S                         | ≤ 0.25                  | 40            |
|            | I                         | 0.5                     | 7.27          |
|            | R                         | ≥ 1                     | 52.72         |
| AMX        | S                         | < 4                     | 69.09         |
|            | I                         | -                       | -             |
|            | R                         | ≥ 4                     | 30.91         |
| LVX        | S                         | < 1                     | 38.18         |
|            | I                         | -                       | -             |
|            | R                         | ≥ 1                     | 61.82         |
| MTZ        | S                         | < 2                     | 1.81          |
|            | I                         | 2 – 4                   | 10.91         |
|            | Low resistance            | > 8                     | 12.72         |
|            | Moderate resistance       | 32 – 64                 | 21.82         |
|            | High resistance           | 128                     | 52.73         |

CLR: Clarithromycin; AMX: Amoxicillin; LVX: Levofloxacin; MTZ: Metronidazole.  
S: Sensitive; I: Intermediate; R: Resistant.
