# Supplementary material for: Dysbiosis by Eradication of Helicobacter pylori Infection Associated with Follicular Gastropathy and Pangastropathy
Source: MDPI journal article supplement (doi:10.3390/microorganisms11112748), 2023-11-10
Supplement: s1 [file s1]

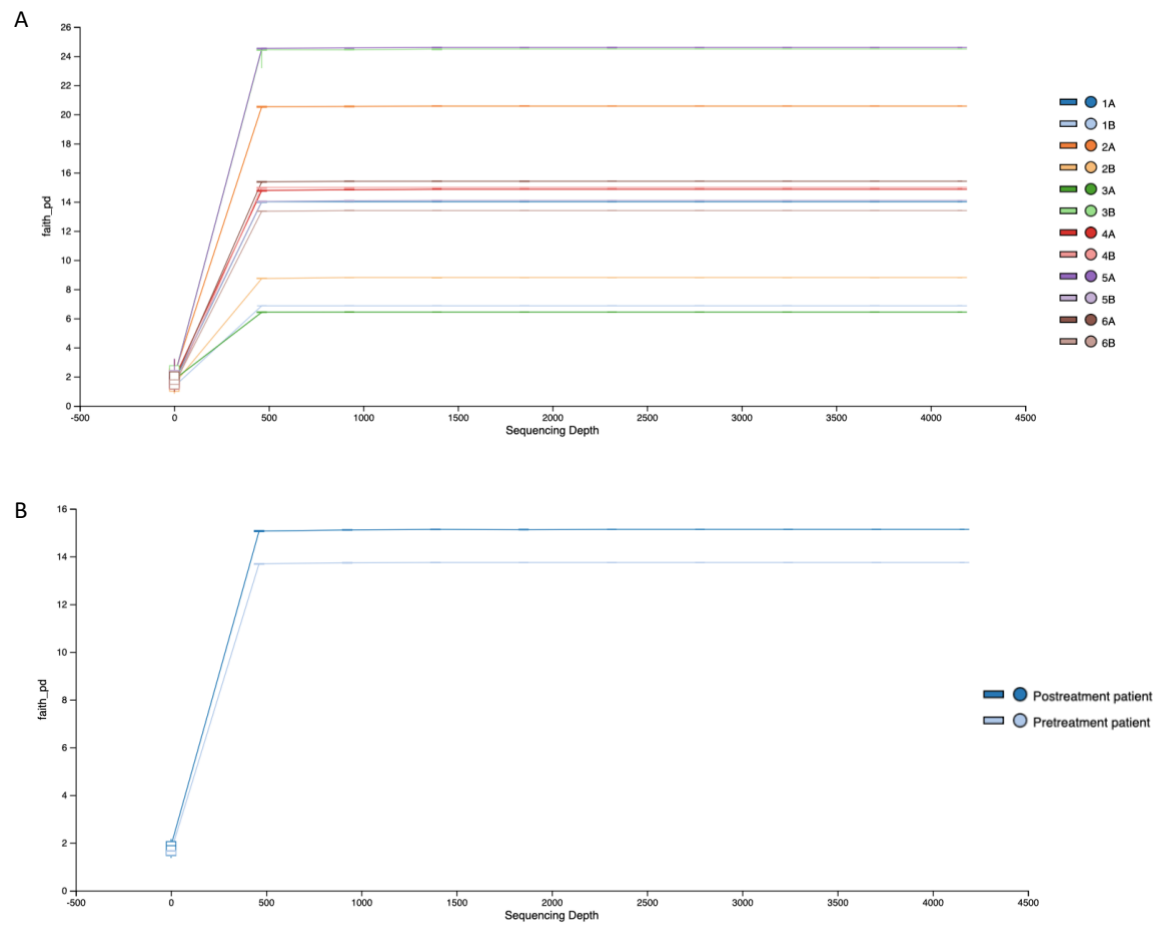

**Supplementary Figure S5. Alpha rarefaction for Faith's PD.** A: Rarefaction curve by patient (B: Pre-treatment patient; A: Posttreatment patient). B: Rarefaction curve by treatment status.
