# Supplementary material for: Dysbiosis by Eradication of Helicobacter pylori Infection Associated with Follicular Gastropathy and Pangastropathy
Source: MDPI journal article supplement (doi:10.3390/microorganisms11112748), 2023-11-10
Supplement: s1 [file s1]

**Supplementary Table S2. Evaluation of susceptibility to four different antibiotics in three primary cultures of *H. pylori* isolated from three *H. pylori* patients with follicular gastropathy and pangastropathy.**

| Antibiotic | MIC<br>( $\mu\text{g/mL}$ ) |      |      |
|------------|-----------------------------|------|------|
|            | 1B                          | 5B   | 6B   |
| CLR        | 0.03125                     | 0.25 | > 64 |
| AMX        | > 64                        | 0.25 | 32   |
| LVX        | > 64                        | 0.5  | 8    |
| MTZ        | > 1024                      | 64   | 128  |

**B:** Pre-treatment patient.

CLR: Clarithromycin; AMX: Amoxicillin; LVX: Levofloxacin; MTZ: Metronidazole.
