# Supplementary material for: Dysbiosis by Eradication of Helicobacter pylori Infection Associated with Follicular Gastropathy and Pangastropathy
Source: Microorganisms. 2023 Nov 10;11(11):2748. doi: 10.3390/microorganisms11112748 (PMC10673246; doi:10.3390/microorganisms11112748)
Supplement: Supplementary file 1 [file microorganisms-11-02748-s001.zip]

Archive with 26 entries (26 files):
- Metagenomic relative abundances and representative sequences.xlsx
- __MACOSX/._Metagenomic relative abundances and representative sequences.xlsx
- qRT-PCR data.xlsx
- __MACOSX/._qRT-PCR data.xlsx
- Supplementary Figure S1.pdf
- __MACOSX/._Supplementary Figure S1.pdf
- Supplementary Figure S2.pdf
- __MACOSX/._Supplementary Figure S2.pdf
- Supplementary Figure S3.pdf
- __MACOSX/._Supplementary Figure S3.pdf
- Supplementary Figure S4.pdf
- __MACOSX/._Supplementary Figure S4.pdf
- Supplementary Figure S5.pdf
- __MACOSX/._Supplementary Figure S5.pdf
- Supplementary Figure S6.pdf
- __MACOSX/._Supplementary Figure S6.pdf
- Supplementary Figure S7.pdf
- __MACOSX/._Supplementary Figure S7.pdf
- Supplementary Table S1.pdf
- __MACOSX/._Supplementary Table S1.pdf
- Supplementary Table S2.pdf
- __MACOSX/._Supplementary Table S2.pdf
- Supplementary Table S3.pdf
- __MACOSX/._Supplementary Table S3.pdf
- Supplementary Table S4.pdf
- __MACOSX/._Supplementary Table S4.pdf
