# Supplementary material for: Dysbiosis by Eradication of Helicobacter pylori Infection Associated with Follicular Gastropathy and Pangastropathy
Source: Microorganisms. 2023 Nov 10;11(11):2748. doi: 10.3390/microorganisms11112748 (PMC10673246; doi:10.3390/microorganisms11112748)
Supplement: Supplementary file 1 [file microorganisms-11-02748-s001.zip › Metagenomic relative abundances and representative sequences.xlsx]

## Sheet: Phylum_percentage
Taxa and Samples	X1A	X1B	X2A	X2B	X3A	X3B	X4A	X4B	X5A	X5B	X6A	X6B
p__Actinobacteriota	47.197	53.8265	6.9018	75.9973	47.9908	54.8943	8.93652	37.6766	43.7815	51.4929	18.4104	5.0118
p__Proteobacteria	22.6642	46.1735	45.2426	24.0027	44.7681	25.0136	43.479	39.0274	22.3942	18.2561	59.1945	33.2987
p__Chloroflexi	0	0	0	0	0	3.07077	0	1.73525	9.05538	15.8348	0	0
p__Campilobacterota	0	0	2.42559	0	0	0	0	0	0	0	0	46.2199
p__Firmicutes	20.7783	0	7.54629	0	7.2411	4.92815	4.71558	10.983	7.83047	14.4162	5.14241	9.24021
p__Bacteroidota	0	0	0	0	0	5.49756	0	2.46259	10.2878	0	10.8672	0
p__Cyanobacteria	0	0	31.1577	0	0	0	42.8689	8.11513	0	0	0	6.22935
p__Deinococcota	0	0	2.51933	0	0	0	0	0	0.94687	0	6.3854	0
p__Dependentiae	0	0	0	0	0	6.59572	0	0	5.70376	0	0	0
p__Gemmatimonadota	0	0	4.2067	0	0	0	0	0	0	0	0	0
p__Acidobacteriota	5.84605	0	0	0	0	0	0	0	0	0	0	0
p__Planctomycetota	3.51449	0	0	0	0	0	0	0	0	0	0	0

## Sheet: Genus_percentage
Taxa	1B	2B	3B	4B	5B	6B	1A	2A	3A	4A	5A	6A
Synechococcus	0	0	0	7.13705	0	7.00079	0.00590005	11.2877	0	19.8519	0	0
Pseudanabaena	0	0	0	0.0125102	0	0.00658588	0	0.505418	0	0.00838106	0.00661288	0
Oscillatoria	0	0	0	0.00625508	0	0	0	0.325459	0	0.988965	0	0
Acinetobacter	6.67342	0.0213303	4.04174	10.3397	2.24062	0	0.0118001	4.42624	0.0276874	0.00838106	6.44756	5.74214
Moraxella	0	0	0	0.00625508	0	0	0.00590005	0.0382892	0	0	0	0.0676482
Psychrobacter	0	0	0	0.0125102	0	0	0.0118001	0.134012	0	0.0139684	0	0.2885
Pseudomonas	20.6567	0.0071101	0	6.71796	0	0	45.8611	61.8601	49.782	67.7497	0.0132258	4.91047
Enterobacter	0	0	0	0.100081	0	0.0592729	0.0472004	0.0421182	0	0	0	0.00198965
Erwinia	0	0	0.025143	0.0625508	0	0.171233	0.0472004	0.0957231	0	0	0.0264515	0.0218862
Escherichia	0	0.00355505	0.0188573	0.231438	0.00451284	0.368809	0.0649006	0.984033	0.0138437	0	0.0396773	0.00795862
Klebsiella	0	0	0.0125715	0.0125102	0	0.0263435	0.00590005	0.0114868	0.00692185	0	0.0396773	4.38321
Providencia	0.00482183	0.00355505	0.00628575	0.0187652	0	0.0197576	0.0177002	0	0	0	0	0
Salmonella	0	0	0.00628575	0.0187652	0	0.0987882	0.0177002	0.0229735	0	0.00838106	0.00661288	0.00795862
Xenorhabdus	0	0	0	0.0125102	0	0.0395153	0.00590005	0.0153157	0	0.00279369	0.00661288	0.00198965
Yersinia	0	0	0.00628575	0.0125102	0	0.0329294	0	0.0229735	0	0	0.0132258	0
Photorhabdus	0	0	0	0.00625508	0	0.052687	0.0118001	0.00765785	0	0.00279369	0	0
Buchnera	0	0	0	0.0125102	0	0.0263435	0.0177002	0.0114868	0.00692185	0	0	0.00397931
Wigglesworthia	0	0.0071101	0.00628575	0.0187652	0	0.0658588	0.00590005	0.0229735	0.0138437	0	0.0198386	0.00596896
Pantoea	0	0	0.050286	2.62088	0	0.144889	0.0118001	0.0306314	0	0.00279369	0.0396773	0.00994827
Sodalis	0	0	0	0.0125102	0	0.0131718	0.00590005	0.0191446	0	0	0	0
Pectobacterium	0	0	0	0.00625508	0	0.0461012	0.0118001	0.0191446	0	0	0	0.00198965
Dickeya	0	0	0	0.0312754	0	0.052687	0.0118001	0.0344603	0	0	0	0
Siccibacter	0	0	0	0	0	0.0131718	0.00590005	0.00382892	0	0	0	0
Coxiella	0.0626838	0.0248853	0.0440003	0.0688059	0.00451284	0.131718	0.0177002	0.0114868	0.0276874	0.0167621	0	0.00397931
Nitrosococcus	0	0.0177752	0	0	0	0	0	0	0	0.00558737	0.00661288	0.00198965
Alkalilimnicola	0	0	0.00628575	0	1.62913	0	0	0.00382892	0.0138437	0	0	0.00198965
Spiribacter	0	0	0	0.00625508	0	0	0.00590005	0.00382892	0	0	0	0
Halothiobacillus	0.00482183	0	0	0	0	0	0	0	0	0.00279369	0.00661288	0
Xanthomonas	0	23.1149	0	0	0	0	0	0	0.00692185	0.00279369	0	0.00994827
Pseudoxanthomonas	0	0.00355505	0	0	0	0.00658588	0	0.00382892	0	0	0	0
Kangiella	0.00482183	0.00355505	0	0	0.00225642	0	0	0	0	0	0	0.00596896
Alteromonas	0.202517	0.00355505	0.0188573	0	0	0.00658588	0	0.00765785	0.131515	0.00558737	0.0396773	0.0656586
Marinobacter	0.00482183	0	0	0	0	0	0.0118001	0.00765785	0	0.0111747	0	0.00198965
Glaciecola	0	0.00355505	0	0	0	0	0.00590005	0	0	0.00279369	0	0
Teredinibacter	0	0	0.477717	0	0	0	0	0.00382892	0	0	1.05806	0
Pseudoalteromonas	0	0.00355505	0.00628575	0	0	0	0	0	0	0	0.0198386	0
Colwellia	0.00482183	0.00355505	0	0	0	0	0	0.0114868	0	0.00279369	0	0
Shewanella	0	0	0.00628575	0	0.00225642	0.00658588	0	0	0	0	0	0
Psychromonas	0	0	0.00628575	0	0.00225642	0	0	0	0	0	0.00661288	0
Vibrio	0.00964367	0	0	0	0	0.00658588	0.00590005	0.00382892	0.0138437	0	0.00661288	0.00397931
Haemophilus	0.00482183	0.00355505	0	0	0.00225642	0	0.00590005	0	0	1.11189	0	0.00397931
Aggregatibacter	0	0.00355505	0	0.00625508	0	0	0	0	0	0	0.00661288	0
Acidithiobacillus	0	0.00355505	0	0.0125102	0	0	0	0	0	0.00838106	0	0
Methylocystis	0	0	0.025143	0	0	0.00658588	0	0	0	0	0.0132258	0
Hyphomicrobium	0	0	0.025143	0.0437856	0	0	0.00590005	0	0	0	0.00661288	0.00198965
d__Bacteria|p__Proteobacteria|c__Alphaproteobacteria|o__Rhizobiales|f__Rhizobiaceae|g__Candidatus_Liberibacter	0	0	0	0	0	0.00658588	0	0.00382892	0	0	0.00661288	0
Agrobacterium	0	0	0.0880005	0.00625508	0	0.0658588	0.0118001	1.39756	0.00692185	0.00279369	0.0859675	0
Methylobacterium	0.00964367	0	16.1607	0	0	13.4484	3.81143	1.49328	0	0	14.8591	0
Starkeya	0	0	10.7612	0	0.00225642	10.7416	1.02661	0.340774	0	0	3.70983	0.00198965
Rickettsia	0	0.0142202	0	0	0.00225642	0	0.0118001	0.0344603	0.00692185	1.3717	0.00661288	0.00397931
Orientia	0.0192873	0.0142202	0.0440003	0	0.00451284	0.0592729	0.0118001	0.0650917	0	0.00279369	0.0264515	0.00397931
d__Bacteria|p__Proteobacteria|c__Alphaproteobacteria|g__Candidatus_Pelagibacter	0.00482183	0	0.00628575	0	0	0	0	0.00382892	0	0.00279369	0	0
Rhodospirillum	0	0	0	0	0	0.00658588	0.00590005	0	0.00692185	0	0	0
Paracoccus	0	8.3757	0.00628575	0	0	0	0	0	0	0	0	0.00397931
Rhodobacter	0	0.0213303	0.00628575	0	0	0	0	0.00382892	0	0	0	0.00596896
Pseudovibrio	0	0	0.00628575	0	0	0	0	0	0	0	0	0
Dinoroseobacter	0	0.00355505	0.00628575	0	0	0.00658588	0	0	0	0	0	0
Hyphomonas	0	0.00355505	0	0	0.00676926	0	0	0	0	0	0	0
Sphingomonas	9.35918	0	0	0.100081	0	0	0.00590005	0	0	0.2654	0	0
Sphingobium	0.949901	0	0	0	0	0	0	0	0	0.00838106	0	0.00795862
Phenylobacterium	0	0	0	0	0.00225642	0.00658588	0	0	0	0	0.00661288	0
Caulobacter	0	0.394611	0	0	3.73212	0	0	0	0	0	0	0
Brevundimonas	0	0.668349	0.678861	0	6.95654	0.00658588	0	0	0	0	0	0
Nitrosomonas	0	0	0	0	0.00451284	0	0.00590005	0.00382892	0	0	0	0
Nitrosospira	0	0.0071101	0	0.00625508	0	0	0	0	0	0	0	0
Bordetella	0	0.0071101	0	0	0	0.0131718	0	0	0.048453	0	0	0.00198965
Advenella	0	0.00355505	0	0	0.00225642	0	0	0	0	0	0	0
Polaromonas	0	0.00355505	1.81658	0	0	0.00658588	0	0	0	0	0	0
Delftia	0	0.135092	0	0.0813161	0	0.599315	0	0	0	0	0	0
Ramlibacter	0	0.00355505	0	0	0.00225642	0	0	0	0	0	0	0
d__Bacteria|p__Proteobacteria|c__Betaproteobacteria|o__Burkholderiales|f__Comamonadaceae|g__Candidatus_Symbiobacter	0	0.00355505	0.0125715	0.00625508	0	0.00658588	0	0	0	0	0	0
Burkholderia	0.00482183	0.138647	0	0	0	0	0	0.0229735	0.0207656	0	0	0
Ralstonia	0	10.299	0.00628575	0.963283	0	0	0	0.00765785	0.0346093	0	0	0
Cupriavidus	0	0.0213303	0	0	0	0	0	0	0	0	0.00661288	0
Leptothrix	0	0.00355505	0	0	0	0.0131718	0.00590005	0.00382892	0.0622967	0	0	0
Thiomonas	0	0.0142202	0	0.00625508	0.00225642	0.0724447	0.0472004	0.0153157	0.574514	0.0195558	0	0.00596896
Methylibium	0	0.00355505	0	0.0125102	0	0.052687	0.00590005	0.00382892	0.152281	0.00558737	0	0
d__Bacteria|p__Proteobacteria|c__Betaproteobacteria|g__Candidatus_Tremblaya	0.00482183	0.0248853	0	0.00625508	0	0	0	0	0.00692185	0	0.00661288	0
Methylovorus	0	0.0071101	0	0	0.00225642	0.00658588	0.00590005	0.00382892	0.00692185	0	0	0
Neisseria	0	0	0	0	5.51469	15.4571	0	0	0.00692185	0.00279369	0	0
Laribacter	0	0	0.00628575	0	0.00225642	0	0	0	0	0	0	0
Azoarcus	0	0	0.00628575	0	0	0	0	0	0	0	0.00661288	0
Thauera	0.00482183	0	0	0	0.00225642	0	0	0	0	0	0	0
Sorangium	0.00964367	0	0	0	0.00225642	0	0	0.00382892	0	0.00279369	0	0.00198965
Haliangium	0.0144655	0	0.0188573	0.00625508	0	0	0.0118001	0	0.00692185	0.00279369	0	0.00198965
d__Bacteria|p__Proteobacteria|c__Deltaproteobacteria|g__Candidatus_Babela	0	0	15.0984	0	0	0.00658588	0	0	0	0	10.4748	0
Geobacter	0	0	0	0.00625508	0	0	0	0	0.00692185	0	0	0
Hippea	0	0	0.00628575	0	0	0.00658588	0	0	0	0	0	0
Desulfovibrio	0	0	0.025143	0	0.00676926	0.00658588	0	0.0382892	0	0	0.00661288	0.00198965
Desulfomicrobium	0	0	0	0	0	0.00658588	0	0	0	0.00279369	0	0.00198965
Syntrophobacter	0	0.0071101	0	0	0	0	0	0.00382892	0	0	0.00661288	0
Helicobacter	0	0	0.00628575	0	0.00225642	8.83166	0	0.850021	0	0	0	0
Sulfurimonas	0	0.00355505	0	0	0	0.0658588	0	0.00382892	0	0	0.00661288	0
Arcobacter	0	0	0.232573	0	0	0	0	0	0	0	0.138871	0
Staphylococcus	0.00482183	0	0.0880005	3.52787	0.0225642	29.1425	14.52	0.00765785	11.5249	0.857662	0.0330644	0.00198965
Macrococcus	0	0	0.00628575	0.00625508	0	0.0461012	0	0.00382892	0	0	0	0.00198965
Bacillus	0	0.0106651	0.352002	0	1.66072	0.00658588	0.0236002	0	0	0.00558737	0.185161	0.00397931
Amphibacillus	0.00964367	0.00355505	0.25143	0.00625508	0.00451284	0	0.00590005	0	0	0	0.0595159	0
Geobacillus	0	0	4.81488	0	0.178257	0.0131718	0	0.00382892	0	0	8.37852	0
Listeria	0	0.00355505	0	0	0.00451284	0	0.00590005	0.00382892	0	0.00558737	0	0
Kyrpidia	0	0.00355505	0	0	0.00451284	0	0	0	0	0	0	0.00397931
Streptococcus	0	0	0.565718	15.0935	0.00225642	0.0197576	0.00590005	1.10273	0.00692185	0.00279369	0.965481	0.00795862
Lactobacillus	0.00482183	0.00355505	0.00628575	0	0.00902568	0	0.00590005	0.00382892	0	0	0	0.00198965
Leuconostoc	0	0	0	0	0.00225642	0.00658588	0	0	0	0	0.00661288	0.00198965
Enterococcus	0	0.0213303	0.025143	0.0187652	0.00676926	0.0197576	0.00590005	0.00382892	0	0	0.00661288	0
Tetragenococcus	0.00964367	0	0	0.00625508	0	0.00658588	0	0	0	0	0	0
Halobacteroides	0.00482183	0	0	0	0	0.00658588	0	0	0	0	0	0
Coprothermobacter	0	0	0	0	0	0.00658588	0	0	0	0	0	0.00198965
Thermodesulfobium	0.00482183	0	0	0.00625508	0	0.0131718	0	0	0.00692185	0.00838106	0	0
Thermoanaerobacterium	0	0	0	0	0.00225642	0	0	0	0	0	0	0.00397931
Mahella	0	0	0.383431	0	0.0135385	0	0	2.01784	0	0	0.621611	0.00198965
Clostridium	0.00964367	0.0071101	0.00628575	0.00625508	1.76903	0.00658588	0.0295003	0	0.0207656	0.00558737	0	22.308
Heliobacterium	0	0.00355505	0	0.00625508	0	0.0197576	0	0.00382892	0.00692185	0.0195558	0	0
Roseburia	0.00482183	0	0	0	0	0	0	0.0918942	0	0	0	0
Cellulosilyticum	0	0	0.00628575	0	0	0.0197576	0.00590005	0	0	0.00279369	0.00661288	0.00795862
Lachnoclostridium	0.0144655	0.0106651	0	0.0437856	0.00902568	0.0197576	0.0236002	0.0153157	0.0346093	0.0195558	0.0793546	0.0238758
Filifactor	0	0	0	0	0.00451284	0	0	0	0	0	0	0
Peptoclostridium	0.00482183	0	0.0125715	0	0.00225642	0.00658588	0.00590005	0.0114868	0.0138437	0.00558737	0.0198386	0.00596896
Eubacterium	0.00482183	0.00355505	0	0.00625508	0.00451284	0.00658588	0.0118001	0.00382892	0.0138437	0.00558737	0	0.00198965
Desulfotomaculum	0	0	0.00628575	0	0.0361027	0.0131718	0	0.00382892	0	0.00279369	0.00661288	0
Oscillibacter	0	0	0.00628575	0	0	0	0.00590005	0.00765785	0.0207656	0	0.00661288	0.00198965
Sulfobacillus	0.00964367	0	0	0	0.00225642	0.00658588	0	0	0	0.00279369	0	0
Ruminococcus	0	0.0071101	0.00628575	0	0.00451284	1.8638	0.0118001	0	0	0.0139684	0.0264515	0.00596896
Ruminiclostridium	0	0	0	0	0.0135385	0	0	0	0.00692185	0	0.00661288	0
Finegoldia	0	0	0.0125715	0	6.66321	0	0	0	0	0	0	0.00198965
Anaerococcus	0	0.0071101	0	0	0.00225642	0.00658588	0.00590005	0.0114868	0.0138437	0	0	0.00397931
Veillonella	0	0	0.00628575	0	0	0	0	0.0191446	0	0	0	0
Acidaminococcus	0	0	0	0	0.00225642	0	0.00590005	0	0	0	0.00661288	0.00198965
Deinococcus	0	0.0071101	0.188573	0.00625508	0.00902568	0.00658588	0.00590005	1.37841	0	0.00279369	0.0661288	6.7509
Truepera	0	0	0.71029	0	0	0	0	0	0	0	1.36225	0.00397931
Fusobacterium	0	0	0	0.00625508	0	0	0	0.00382892	0	0	0	0
Nitrospira	0	0	0	0	0.00225642	0	0	0	0.00692185	0	0	0
Caldisericum	0	0	0.00628575	0	0	0	0.00590005	0	0	0	0	0.00198965
Dictyoglomus	0.00482183	0.00355505	0	0	0	0.00658588	0	0	0	0	0	0
Flavobacterium	0	0	0.377145	0	0	0	0	0	0	0	0.654675	0
Weeksella	0	0	0	1.45118	0	0	0	0	0	0	0.0198386	0
Ornithobacterium	0	0	0	0.00625508	0	0	0	0	0	0	0.00661288	0
Riemerella	0	0.00355505	1.89201	0.00625508	0	0	0	0	0	0	2.74435	0
d__Bacteria|p__Bacteroidetes|c__Flavobacteriia|o__Flavobacteriales|g__Candidatus_Sulcia	0	0	0	0.212673	0	0	0	0.00382892	0	0	0	0
Chitinophaga	0	0	0.0314288	0	0	0	0	0	0	0	0.119032	0
Niastella	0	0	0.729147	0	0	0.00658588	0	0	0	0	1.14403	0
Bacteroides	0	0.0213303	0.0188573	0.0187652	0.0112821	0.0197576	0.0649006	0.0191446	0.0553748	0.0251432	0.0264515	0.308396
Alistipes	0	0.00355505	0	0	0	0	0	0.00382892	0	0	0.00661288	0
Tannerella	0	0	0	0.075061	0.00225642	0	0	0.00382892	0	0	0	0.00198965
Parabacteroides	0	0	0.00628575	0.00625508	0.00225642	0	0	0.00382892	0	0.00558737	0	0.0159172
Prevotella	0	0	0.427431	0.00625508	0	0.0263435	0.0118001	0.00382892	0.0346093	0.00558737	0.64145	3.50179
d__Bacteria|p__Bacteroidetes|c__Bacteroidia|o__Bacteroidales|g__Candidatus_Azobacteroides	0	0.00355505	0	0	0	0	0	0	0.00692185	0	0	0.00596896
Marivirga	0.00964367	0	0	0.00625508	0	0	0	0	0	0.00838106	0	0
Cyclobacterium	0.00482183	0.00355505	0.00628575	0	0	0	0.00590005	0.00382892	0	0	0	0
Belliella	0	0	0.00628575	0	0	0	0	0	0	0	0	0
d__Bacteria|p__Bacteroidetes|c__Cytophagia|o__Cytophagales|f__Amoebophilaceae|g__Candidatus_Amoebophilus	0	0.0106651	0.00628575	0.0125102	0.00676926	0	0	0	0	0	0	0
Salinibacter	0	0	0	0	0.00225642	0	0.0118001	0	0	0	0.00661288	0.0139276
d__Bacteria|p__Acidobacteria|c__Solibacteres|o__Solibacterales|f__Solibacteraceae|g__Candidatus_Solibacter	0.00482183	0	0	0	0.00676926	0.00658588	0	0	0	0	0	0
Chloracidobacterium	0	0	0	0	0.0135385	0	2.82613	0	0	0	0	0.00198965
Fibrobacter	0	0	0	0	0	0.00658588	0	0	0	0	0	0.00198965
Hydrogenobaculum	0	0	0	0	0	0.0197576	0	0	0	0	0	0
Roseiflexus	0	0	0.169715	0	0.0609233	0	0	0	0	0	0.290967	0
Herpetosiphon	0	0	0.0440003	0	0.130872	0	0	0	0	0	0.00661288	0
Sphaerobacter	0	0	10.8492	0	6.40597	0	0	0	0	0	8.02143	0
Thermomicrobium	0	0	0.00628575	0	0	0	0	0.00382892	0	0	0.00661288	0
Anaerolinea	0	0	0.0125715	0.00625508	0	0	0.0413004	0.00382892	0	0	0	0
Dehalogenimonas	0	0	0	0.00625508	0	0	0	0	0	0	0.00661288	0
Dehalococcoides	0	0	0	0	0.00451284	0	0	0	0	0	0.00661288	0
Caldilinea	0	0	1.79772	0	0	0	0	0	0	0	2.6716	0
Mobiluncus	0.00482183	0.00355505	0	0	0.00225642	0	0	0	0	0	0	0.00198965
Arcanobacterium	0	0.0071101	0.00628575	0	0.00451284	0	0	0	0	0.00558737	0.0132258	0
Bifidobacterium	0.00964367	3.09289	0.00628575	0	0.00451284	0	0.00590005	1.83405	0.00692185	0	0	0.00994827
Micrococcus	0	0	0.169715	0	0	0	4.06514	0	0.00692185	0	0.350483	0
Arthrobacter	0	0.00355505	0.0942863	0	0	0	0	0	0	0	0.191774	0
Rothia	0	0.0142202	0.025143	0	0	0	0	0.00382892	0	0	0.0198386	0
Kocuria	0	0.0391055	1.69087	4.34103	0.0157949	0	0.00590005	0	0	0.0391116	2.03677	0
Cellulomonas	0	0.0142202	0.0125715	0	0	0	0	0	0.00692185	0	0.0330644	0
Xylanimonas	0	0.0391055	0.0440003	0.00625508	0.00451284	0	0	0	0.0207656	0.00279369	0.00661288	0
Isoptericola	0	0.00355505	0.270287	0	0	0	0	0	0	0	0.244677	0
Brachybacterium	0.173586	0.071101	0.119429	0.0625508	5.20556	0	0.0118001	0.0153157	0	0.00838106	0.165322	0.00994827
Intrasporangium	0	0.0284404	0.320573	0	0	0	0	0	0	0	0.707578	0
Jonesia	0.0144655	1.50734	0.00628575	0	0.00225642	0.00658588	0	0	0.0138437	0.00558737	0	0
Clavibacter	0	8.63522	0	0.00625508	0	0	0	0	0	0	0	0
Microbacterium	0.0433965	0.0888762	0.0188573	1.69513	0.0225642	0	0.0118001	0	0.00692185	0	0.00661288	0.00397931
Leifsonia	0.00482183	0.0284404	1.00572	0.0250203	0.0180514	0	0	0	0	0.00279369	2.04999	0.00994827
Beutenbergia	0	0.0462156	0.00628575	0	1.92473	0	0	0	0.0138437	0	0	0
Kytococcus	0	0.0071101	2.09315	0	0	0	0	0	0	0	3.4916	0
Sanguibacter	0.0241092	0.0319954	0.0565718	0	0.112821	0.00658588	0.00590005	0	0	0.00558737	0.0132258	0.00795862
Tropheryma	0	0.0106651	0.0188573	0.00625508	0.00225642	0	0	0	0	0	0.0198386	0
Corynebacterium	8.72752	0.0284404	2.13087	9.45768	1.46893	0	1.62841	0.0191446	0.145359	5.41975	3.41886	0.00596896
Mycobacterium	0.424321	0.0319954	0.144572	0	0.00225642	0	0.0885008	0	14.5705	0	0.257902	0.00397931
Nocardia	0.00482183	0	0.100572	0	0.00225642	0	0.200602	0	0.0692185	0	0.0264515	0
Rhodococcus	0.00482183	0	0.0377145	0.00625508	0.0586669	0	0.678506	0	15.6019	0	0.0198386	0
Gordonia	0.135011	0	0.678861	0.0125102	5.61397	0	0.0826007	0	0.470686	0.00838106	1.19693	0
Tsukamurella	17.455	0	0	1.14468	3.40945	0	10.4726	0	0.311483	0.868836	0.00661288	0
Segniliparus	0.00482183	0	0	0	0.00225642	0	0.0177002	0.00382892	0.0692185	0	0	0.00198965
Micromonospora	3.30296	0.00355505	0	0.193908	0.523489	0	0.472004	0	0	0.0279369	0	0
Salinispora	0.0192873	0.00355505	0.0188573	0	0.00676926	0	0	0	0	0	0	0.00198965
Cutibacterium	31.3708	20.502	10.9183	28.7233	36.4479	10.4123	8.15977	3.53793	0.0138437	0.815756	8.19997	22.4493
Microlunatus	0.00964367	0.0071101	0.0377145	0.0187652	0.00902568	0	0	0.287169	0	0	0.0264515	0.00397931
Nocardioides	0.0144655	0.0142202	5.39946	4.74135	0.0586669	0.0987882	0.00590005	0	0	0	6.18966	0.00198965
Kribbella	0.00964367	0.0071101	0.00628575	0.00625508	0.00676926	0	0.0118001	1.04913	0.0138437	0.00279369	0	0.00198965
Saccharopolyspora	0	0.00355505	0	0.00625508	0.00451284	0	0	0	0	0	0	0
Saccharothrix	0.00482183	0.309289	0	0	0.0383591	0	0.295003	0	0	0	0	0
Actinosynnema	0.0241092	0.0071101	0	0	0.00225642	0	0	0	0	0	0	0
Streptomyces	0.00482183	0	0.0314288	0.0125102	0.00676926	0	0	0	0	0	0.0264515	0.00198965
Streptosporangium	0	0	0	0.00625508	0.00225642	0	0	0	0	0	0.00661288	0
Frankia	0	0	0	0	0.00451284	0	0	0.00382892	0	0	0	0.00994827
Kineococcus	0	0	0.0817148	0	0	0	0	0	0	0	0.0793546	0.00198965
Geodermatophilus	0	9.70529	0	0	6.81213	0	0.607705	0	0	0	0	2.2304
Blastococcus	0	0	0	0	0.706259	0	1.37471	0	0	0	0	7.18066
Acidothermus	0	0.0248853	0.0125715	0	0.00902568	0	0	0	0	0	0.0132258	0.00596896
Nakamurella	0	10.4661	0	0	0	0	0	0.00382892	0	0	0	0
Thermobispora	0	0.00355505	0	0	0.00225642	0	0	0	0.00692185	0	0.0132258	0
Ilumatobacter	0	0.0142202	0	0.00625508	0	0.00658588	0	0	0	0.00279369	0	0.00198965
Conexibacter	0	0	0	0	0	0.00658588	0.00590005	0	0	0	0	0
Spirochaeta	0	0	0	0.0187652	0.00451284	0	0	0	0	0	0	0
Treponema	0	0	0	0	0.00225642	0	0	0	0	0	0	0.00198965
Borrelia	0.00482183	0.0071101	0	0.00625508	0.00225642	0.00658588	0	0	0	0	0	0
Leptospira	0	0	0	0	0.00451284	0	0	0	0	0	0	0
Turneriella	0	0.00355505	0.0125715	0	0	0	0	0	0	0	0	0
Mycoplasma	0.00482183	0	0	0	0.00676926	0.00658588	0	0.0344603	0	0.00279369	0	0.00198965
Rivularia	0	0	0	0	0	0	0	0.00382892	0	0.00279369	0	0
Cyanothece	0	0	0	0	0	0	0	0.00382892	0	0.00279369	0	0.00198965
Cycloclasticus	0	0	0	0	0	0	0.00590005	0	0	0	0.00661288	0
Thioalkalimicrobium	0	0	0	0	0	0	0.0118001	0.0114868	0.00692185	0.00558737	0	0
Serratia	0	0	0	0	0	0	0	0.00765785	0	0.00279369	0	0
Shigella	0	0	0	0	0	0	0.00590005	0.0306314	0	0	0	0.00198965
d__Bacteria|p__Proteobacteria|c__Gammaproteobacteria|o__Enterobacteriales|f__Enterobacteriaceae|g__Candidatus_Hamiltonella	0	0	0	0	0	0	0.00590005	0.00382892	0	0	0.00661288	0.00198965
Methylococcus	0	0	0	0	0	0	0	0	0.00692185	0	0	0.00596896
Thalassolituus	0	0	0	0	0	0	0	0.00382892	0	0	0	0.00198965
Idiomarina	0	0	0	0	0	0	0.00590005	0	0.00692185	0	0	0.00198965
Candidatus_Midichloria	0	0	0	0	0	0	0	0.00765785	0	0	0	0.00198965
Roseobacter	0	0	0	0	0	0	0	0	0.0138437	0	0	16.9339
Polaromonas	0	0	0	0	0	0	0.00590005	0	0.0276874	0.00279369	3.10144	0
Delftia	0	0	0	0	0	0	0.165201	0.0382892	5.39904	0.100573	0	0.0218862
Kinetoplastibacterium	0	0	0	0	0	0	0	0.811732	0.00692185	0	0	0.00198965
Tepidanaerobacter	0	0	0	0	0	0	0.00590005	0	0.00692185	0	0	0
Butyrivibrio	0	0	0	0	0	0	0	0.00382892	0	0	0.00661288	0
Thermaerobacter	0	0	0	0	0	0	0	0.00382892	0	0.0111747	0.0132258	0
Mageeibacillus	0	0	0	0	0	0	0.0177002	0	0	0	0.00661288	0
Akkermansia	0	0	0	0	0	0	0	0	0.00692185	0	0	0.00198965
Chthonomonas	0	0	0	0	0	0	0	0.0765785	0.00692185	0.00279369	0.00661288	0
Stackebrandtia	0	0	0	0	0	0	0	0	0.00692185	0	0.00661288	0.00198965
Modestobacter	0	0	0	0	0	0	0.00590005	0	0	0	0	0.0139276

## Sheet: Cutibacterium_representative_sq
Feature-ID	Taxon	Confidence	Sequence
0930508fab817513ace3b7dd2efbe1d4	d__Bacteria; p__Actinobacteriota; c__Actinobacteria; o__Propionibacteriales; f__Propionibacteriaceae; g__Cutibacterium	1	GCCTACGGGAGGCTGCAGTGGGGAATATTGCACAATGGGCGGAAGCCTGATGCAGCAACGCCGCGTGCGGGATGACGGCCTTCGGGTTGTAAACCGCTTTCGCCTGTGACGAAGCGTGAGTGACGGTAATGGGTAAAGAAGCACCGGCTAACTACGTGCCAGCAGCCGCGGTGATACGTAGGGTGCGAGCGTTGTCCGGATTTATTGGGCGTAAAGGGCTCGTAGGTGGTTGATCGCGTCGGAAGTGTAATCTTGGGGCTTAACCCTGAGCGTGCTTTCGATACGGGTTGACTTGAGGAAGGTAGGGGAGAATGGAATTCCTGGTGGAGCGGTGGAATGCGCAGATATCAGGAGGAACACCAGTGGCGAAGGCGGTTCTCTGGGCCTTTCCTGACGCTG…
0c09aed06cf750a037c116eebb83242d	d__Bacteria; p__Actinobacteriota; c__Actinobacteria; o__Propionibacteriales; f__Propionibacteriaceae; g__Cutibacterium	1	GCCTACGGGAGGCTGCAGTGGGGAATATTGCACAATGGGCGGAAGCCTGATGCAGCAACGCCGCGTGCGGGATGACGGCCTTCGGGTTGTAAACCGCTTTCGCCTGTGACGAAGCGTGAGTGACGGTAATGGGTAAAGAAGCACCGGCTAACTACGTGCCAGCAGCCGCGGTGATACGTAGGGTGCGAGCGTTGTCCGGATTTATTGGGCGTAAAGGGCTCGTAGGTGGTTGATCGCGTCGGAAGTGTAATCTTGGGGCTTAACCCTGAGCGTGCTTTCGATACGGGTTGACTTGAGGAAGGTAGGGGAGAATGGAATTCCTGGTGGAGCGGTGGAATGCGCAGATATCAGGAGGAACACCAGTGGCGAAGGCGGTTCTCTGGGCCTTTCCTGACGCTG…
13a6ff68a50927ce7b932c690ed0398d	d__Bacteria; p__Actinobacteriota; c__Actinobacteria; o__Propionibacteriales; f__Propionibacteriaceae; g__Cutibacterium	1	GCCTACGGGAGGCTGCAGTGGGGAATATTGCACAATGGGCGGAAGCCTGATGCAGCAACGCCGCGTGCGGGATGACGGCCTTCGGGTTGTAAACCGCTTTCGCCTGTGACGAAGCGTGAGTGACGGTAATGGGTAAAGAAGCACCGGCTAACTACGTGCCAGCAGCCGCGGTGATACGTAGGGTGCGAGCGTTGTCCGGATTTATTGGGCGTAAAGGGCTCGTAGGTGGTTGATCGCGTCGGAAGTGTAATCTTGGGGCTTAACCCTGAGCGTGCTTTCGATACGGGTTGACTTGAGGAAGGTAGGGGAGAATGGAATTCCTGGTGGAGCGGTGGAATGCGCAGATATCAGGAGGAACACCAGTGGCGAAGGCGGTTCTCTGGGCCTTTCCTGACGCTG…
202e0f76ea7655890f9d3e4a20b3237d	d__Bacteria; p__Actinobacteriota; c__Actinobacteria; o__Propionibacteriales; f__Propionibacteriaceae; g__Cutibacterium	0.999999	GCCTACGGGAGGCTGCAGTGGGGAATATTGCACAATGGGCGGAAGCCTGATGCAGCAACGCCGCGTGCGGGATGACGGCCTTCGGGTTGTAAACCGCTTTCGCCTGTGACGAAGCGTGAGTGACGGTAATGGGTAAAGAAGCACCGGCTAACTACGTGCCAGCAGCCGCGGTGATACGTAGGGTGCGAGCGTTGTCCGGATTTATTGGGCGTAAAGGGCTCGTAGGTGGTTGATCGCGTCGGAAGTGTAATCTTGGGGCTTAACCCTGAGCGTGCTTTCGATACGGGTTGACTTGAGGAAGGTAGGGGAGAATGGAATTCCTGGTGGAGCGGTGGAATGCGCAGATATCAGGAGGAACACCAGTGGCGAAGGCGGTTCTCTGGGCCTTTCCTGACGCTG…
242ceaa768f7907663fe73399d48119d	d__Bacteria; p__Actinobacteriota; c__Actinobacteria; o__Propionibacteriales; f__Propionibacteriaceae; g__Cutibacterium; s__Cutibacterium_acnes	0.823441	TCTACGGTTGGCAGCAGTGGGGAATATTGCACAATGGGCGGAAGCCTGATGCAGCAACGCCGCGTGCGGGATGACGGCCTTCGGGTTGTAAACCGCTTTCGCCTGTGACGAAGCGTGAGTGACGGTAATGGGTAAAGAAGCACCGGCTAACTACGTGCCAGCAGCCGCGGTGATACGTAGGGTGCGAGCGTTGTCCGGATTTATTGGGCGTAAAGGGCTCGTAGGTGGTTGATCGCGTCGGAAGTGTAATCTTGGGGCTTAACCCTGAGCGTGCTTTCGATACGGGTTGACTTGAGGAAGGTAGGGGAGAATGGAATTCCTGGTGGAGCGGTGGAATGCGCAGATATCAGGAGGAACACCAGTGGCGAAGGCGGTTCTCTGGGCCTTTCCTGACGCTGA…
2517d77df4c1f211e436dc2571e6a406	d__Bacteria; p__Actinobacteriota; c__Actinobacteria; o__Propionibacteriales; f__Propionibacteriaceae; g__Cutibacterium	1	GCCTACGGGAGGCTGCAGTGGGGAATATTGCACAATGGGCGGAAGCCTGATGCAGCAACGCCGCGTGCGGGATGACGGCCTTCGGGTTGTAAACCGCTTTCGCCTGTGACGAAGCGTGAGTGACGGTAATGGGTAAAGAAGCACCGGCTAACTACGTGCCAGCAGCCGCGGTGATACGTAGGGTGCGAGCGTTGTCCGGATTTATTGGGCGTAAAGGGCTCGTAGGTGGTTGATCGCGTCGGAAGTGTAATCTTGGGGCTTAACCCTGAGCGTGCTTTCGATACGGGTTGACTTGAGGAAGGTAGGGGAGAATGGAATTCCTGGTGGAGCGGTGGAATGCGCAGATATCAGGAGGAACACCAGTGGCGAAGGCGGTTCTCTGGGCCTTTCCTGACGCTG…
2b699db80e8e68aac908b0d90e1db09e	d__Bacteria; p__Actinobacteriota; c__Actinobacteria; o__Propionibacteriales; f__Propionibacteriaceae; g__Cutibacterium; s__Cutibacterium_acnes	0.788252	GCCTACGGGAGGCTGCAGTGGGGAATATTGCACAATGGGCGGAAGCCTGATGCAGCAACGCCGCGTGCGGGATGACGGCCTTCGGGTTGTAAACCGCTTTCGCCTGTGACGAAGCGTGAGTGACGGTAATGGGTAAAGAAGCACCGGCTAACTACGTGCCAGCAGCCGCGGTGATACGTAGGGTGCGAGCGTTGTCCGGATTTATTGGGCGTAAAGGGCTCGTAGGTGGTTGATCGCGTCGGAAGTGTAATCTTGGGGCTTAACCCTGAGCGTGCTTTCGATACGGGTTGACTTGAGGAAGGTAGGGGAGAATGGAATTCCTGGTGGAGCGGTGGAATGCGCAGATATCAGGAGGAACACCAGTGGCGAAGGCGGTTCTCTGGGCCTTTCCTGACGCTG…
2e80263daa76b8a15f1bbe042a23928b	d__Bacteria; p__Actinobacteriota; c__Actinobacteria; o__Propionibacteriales; f__Propionibacteriaceae; g__Cutibacterium; s__Cutibacterium_acnes	0.704062	GCCTACGGGAGGCTGCAGTGGGGAATATTGCACAATGGGCGGAAGCCTGATGCAGCAACGCCGCGTGCGGGATGACGGCCTTCGGGTTGTAAACCGCTTTCGCCTGTGACGAAGCGTGAGTGACGGTAATGGGTAAAGAAGCACCGGCTAACTACGTGCCAGCAGCCGCGGTGATACGTAGGGTGCGAGCGTTGTCCGGATTTATTGGGCGTAAAGGGCTCGTAGGTGGTTGATCGCGTCGGAAGTGTAATCTTGGGGCTTAACCCTGAGCGTGCTTTCGATACGGGTTGACTTGAGGAAGGTAGGGGAGAATGGAATTCCTGGTGGAGCGGTGGAATGCGCAGATATCAGGAGGAACACCAGTGGCGAAGGCGGTTCTCTGGGCCTTTCCTGACGCTG…
2ea98c280b69699e55089355fb7154d4	d__Bacteria; p__Actinobacteriota; c__Actinobacteria; o__Propionibacteriales; f__Propionibacteriaceae; g__Cutibacterium	1	GCCTACGGGAGGCTGCAGTGGGGAATATTGCACAATGGGCGGAAGCCTGATGCAGCAACGCCGCGTGCGGGATGACGGCCTTCGGGTTGTAAACCGCTTTCGCCTGTGACGAAGCGTGAGTGACGGTAATGGGTAAAGAAGCACCGGCTAACTACGTGCCAGCAGCCGCGGTGATACGTAGGGTGCGAGCGTTGTCCGGATTTATTGGGCGTAAAGGGCTCGTAGGTGGTTGATCGCGTCGGAAGTGTAATCTTGGGGCTTAACCCTGAGCGTGCTTTCGATACGGGTTGACTTGAGGAAGGTAGGGGAGAATGGAATTCCTGGTGGAGCGGTGGAATGCGCAGATATCAGGAGGAACACCAGTGGCGAAGGCGGTTCTCTGGGCCTTTCCTGACGCTG…
35fabf4d81b8daf3e29b8a7e7fc9634e	d__Bacteria; p__Actinobacteriota; c__Actinobacteria; o__Propionibacteriales; f__Propionibacteriaceae; g__Cutibacterium	1	TCCTACGGGTGGCTGCAGTGGGGAATATTGCACAATGGGCGGAAGCCTGATGCAGCAACGCCGCGTGCGGGATGACGGCCTTCGGGTTGTAAACCGCTTTCGCCTGTGACGAAGCGTGAGTGACGGTAATGGGTAAAGAAGCACCGGCTAACTACGTGCCAGCAGCCGCGGTGATACGTAGGGTGCGAGCGTTGTCCGGATTTATTGGGCGTAAAGGGCTCGTAGGTGGTTGATCGCGTCGGAAGTGTAATCTTGGGGCTTAACCCTGAGCGTGCTTTCGATACGGGTTGACTTGAGGAAGGTAGGGGAGAATGGAATTCCTGGTGGAGCGGTGGAATGCGCAGATATCAGGAGGAACACCAGTGGCGAAGGCGGTTCTCTGGGCCTTTCCTGACGCTG…
439351b19488781c1eb7456024ac7591	d__Bacteria; p__Actinobacteriota; c__Actinobacteria; o__Propionibacteriales; f__Propionibacteriaceae; g__Cutibacterium	1	GCCTACGGGAGGCTGCAGTGGGGAATATTGCACAATGGGCGGAAGCCTGATGCAGCAACGCCGCGTGCGGGATGACGGCCTTCGGGTTGTAAACCGCTTTCGCCTGTGACGAAGCGTGAGTGACGGTAATGGGTAAAGAAGCACCGGCTAACTACGTGCCAGCAGCCGCGGTGATACGTAGGGTGCGAGCGTTGTCCGGATTTATTGGGCGTAAAGGGCTCGTAGGTGGTTGATCGCGTCGGAAGTGTAATCTTGGGGCTTAACCCTGAGCGTGCTTTCGATACGGGTTGACTTGAGGAAGGTAGGGGAGAATGGAATTCCTGGTGGAGCGGTGGAATGCGCAGATATCAGGAGGAACACCAGTGGCGAAGGCGGTTCTCTGGGCCTTTCCTGACGCTG…
58f7f339c107d8a7e11737a8f2db8dfa	d__Bacteria; p__Actinobacteriota; c__Actinobacteria; o__Propionibacteriales; f__Propionibacteriaceae; g__Cutibacterium	0.999999	GCCTACGGGAGGCTGCAGTGGGGAATATTGCACAATGGGCGGAAGCCTGATGCAGCAACGCCGCGTGCGGGATGACGGCCTTCGGGTTGTAAACCGCTTTCGCCTGTGACGAAGCGTGAGTGACGGTAATGGGTAAAGAAGCACCGGCTAACTACGTGCCAGCAGCCGCGGTGATACGTAGGGTGCGAGCGTTGTCCGGATTTATTGGGCGTAAAGGGCTCGTAGGTGGTTGATCGCGTCGGAAGTGTAATCTTGGGGCTTAACCCTGAGCGTGCTTTCGATACGGGTTGACTTGAGGAAGGTAGGGGAGAATGGAATTCCTGGTGGAGCGGTGGAATGCGCAGATATCAGGAGGAACACCAGTGGCGAAGGCGGTTCTCTGGGCCTTTCCTGACGCTG…
75fcdba38afe08d66fbdc540d92dcda0	d__Bacteria; p__Actinobacteriota; c__Actinobacteria; o__Propionibacteriales; f__Propionibacteriaceae; g__Cutibacterium	1	CCTACGGGGTGCAGCAGTGGGGAATATTGCACAATGGGCGGAAGCCTGATGCAGCAACGCCGCGTGCGGGATGACGGCCTTCGGGTTGTAAACCGCTTTCGCCTGTGACGAAGCGTGAGTGACGGTAATGGGTAAAGAAGCACCGGCTAACTACGTGCCAGCAGCCGCGGTGATACGTAGGGTGCGAGCGTTGTCCGGATTTATTGGGCGTAAAGGGCTCGTAGGTGGTTGATCGCGTCGGAAGTGTAATCTTGGGGCTTAACCCTGAGCGTGCTTTCGATACGGGTTGACTTGAGGAAGGTAGGGGAGAATGGAATTCCTGGTGGAGCGGTGGAATGCGCAGATATCAGGAGGAACACCAGTGGCGAAGGCGGTTCTCTGGGCCTTTCCTGACGCTGA…
787dc2e346ed5c62dfb9de9b6a5e7761	d__Bacteria; p__Actinobacteriota; c__Actinobacteria; o__Propionibacteriales; f__Propionibacteriaceae; g__Cutibacterium	1	GCCTACGGGAGGCTGCAGTGGGGAATATTGCACAATGGGCGGAAGCCTGATGCAGCAACGCCGCGTGCGGGATGACGGCCTTCGGGTTGTAAACCGCTTTCGCCTGTGACGAAGCGTGAGTGACGGTAATGGGTAAAGAAGCACCGGCTAACTACGTGCCAGCAGCCGCGGTGATACGTAGGGTGCGAGCGTTGTCCGGATTTATTGGGCGTAAAGGGCTCGTAGGTGGTTGATCGCGTCGGAAGTGTAATCTTGGGGCTTAACCCTGAGCGTGCTTTCGATACGGGTTGACTTGAGGAAGGTAGGGGAGAATGGAATTCCTGGTGGAGCGGTGGAATGCGCAGATATCAGGAGGAACACCAGTGGCGAAGGCGGTTCTCTGGGCCTTTCCTGACGCTG…
7acf4ebe8a56d6fe8cb10fd10610b344	d__Bacteria; p__Actinobacteriota; c__Actinobacteria; o__Propionibacteriales; f__Propionibacteriaceae; g__Cutibacterium	1	GCCTACGGGAGGCTGCAGTGGGGAATATTGCACAATGGGCGGAAGCCTGATGCAGCAACGCCGCGTGCGGGATGACGGCCTTCGGGTTGTAAACCGCTTTCGCCTGTGACGAAGCGTGAGTGACGGTAATGGGTAAAGAAGCACCGGCTAACTACGTGCCAGCAGCCGCGGTGATACGTAGGGTGCGAGCGTTGTCCGGATTTATTGGGCGTAAAGGGCTCGTAGGTGGTTGATCGCGTCGGAAGTGTAATCTTGGGGCTTAACCCTGAGCGTGCTTTCGATACGGGTTGACTTGAGGAAGGTAGGGGAGAATGGAATTCCTGGTGGAGCGGTGGAATGCGCAGATATCAGGAGGAACACCAGTGGCGAAGGCGGTTCTCTGGGCCTTTCCTGACGCTG…
8074daa70a11f4a9c4b6190a3bbf1ac3	d__Bacteria; p__Actinobacteriota; c__Actinobacteria; o__Propionibacteriales; f__Propionibacteriaceae; g__Cutibacterium	1	GCCTACGGGAGGCTGCAGTGGGGAATATTGCACAATGGGCGGAAGCCTGATGCAGCAACGCCGCGTGCGGGATGACGGCCTTCGGGTTGTAAACCGCTTTCGCCTGTGACGAAGCGTGAGTGACGGTAATGGGTAAAGAAGCACCGGCTAACTACGTGCCAGCAGCCGCGGTGATACGTAGGGTGCGAGCGTTGTCCGGATTTATTGGGCGTAAAGGGCTCGTAGGTGGTTGATCGCGTCGGAAGTGTAATCTTGGGGCTTAACCCTGAGCGTGCTTTCGATACGGGTTGACTTGAGGAAGGTAGGGGAGAATGGAATTCCTGGTGGAGCGGTGGAATGCGCAGATATCAGGAGGAACACCAGTGGCGAAGGCGGTTCTCTGGGCCTTTCCTGACGCTG…
8403771a334d40e1694c73c88d10d5a5	d__Bacteria; p__Actinobacteriota; c__Actinobacteria; o__Propionibacteriales; f__Propionibacteriaceae; g__Cutibacterium	1	GCCTACGGGAGGCTGCAGTGGGGAATATTGCACAATGGGCGGAAGCCTGATGCAGCAACGCCGCGTGCGGGATGACGGCCTTCGGGTTGTAAACCGCTTTCGCCTGTGACGAAGCGTGAGTGACGGTAATGGGTAAAGAAGCACCGGCTAACTACGTGCCAGCAGCCGCGGTGATACGTAGGGTGCGAGCGTTGTCCGGATTTATTGGGCGTAAAGGGCTCGTAGGTGGTTGATCGCGTCGGAAGTGTAATCTTGGGGCTTAACCCTGAGCGTGCTTTCGATACGGGTTGACTTGAGGAAGGTAGGGGAGAATGGAATTCCTGGTGGAGCGGTGGAATGCGCAGATATCAGGAGGAACACCAGTGGCGAAGGCGGTTCTCTGGGCCTTTCCTGACGCTG…
87447d3b247d4d9b1fcda12db642a087	d__Bacteria; p__Actinobacteriota; c__Actinobacteria; o__Propionibacteriales; f__Propionibacteriaceae; g__Cutibacterium	1	GCCTACGGGAGGCTGCAGTGGGGAATATTGCACAATGGGCGGAAGCCTGATGCAGCAACGCCGCGTGCGGGATGACGGCCTTCGGGTTGTAAACCGCTTTCGCCTGTGACGAAGCGTGAGTGACGGTAATGGGTAAAGAAGCACCGGCTAACTACGTGCCAGCAGCCGCGGTGATACGTAGGGTGCGAGCGTTGTCCGGATTTATTGGGCGTAAAGGGCTCGTAGGTGGTTGATCGCGTCGGAAGTGTAATCTTGGGGCTTAACCCTGAGCGTGCTTTCGATACGGGTTGACTTGAGGAAGGTAGGGGAGAATGGAATTCCTGGTGGAGCGGTGGAATGCGCAGATATCAGGAGGAACACCAGTGGCGAAGGCGGTTCTCTGGGCCTTTCCTGACGCTG…
a7ee891466bc8e991fc4afe19d36b6b0	d__Bacteria; p__Actinobacteriota; c__Actinobacteria; o__Propionibacteriales; f__Propionibacteriaceae; g__Cutibacterium	0.999999	TCCTATGGGGCGCTGCAGTGGGGAATATTGCACAATGGGCGGAAGCCTGATGCAGCAACGCCGCGTGCGGGATGACGGCCTTCGGGTTGTAAACCGCTTTCGCCTGTGACGAAGCGTGAGTGACGGTAATGGGTAAAGAAGCACCGGCTAACTACGTGCCAGCAGCCGCGGTGATACGTAGGGTGCGAGCGTTGTCCGGATTTATTGGGCGTAAAGGGCTCGTAGGTGGTTGATCGCGTCGGAAGTGTAATCTTGGGGCTTAACCCTGAGCGTGCTTTCGATACGGGTTGACTTGAGGAAGGTAGGGGAGAATGGAATTCCTGGTGGAGCGGTGGAATGCGCAGATATCAGGAGGAACACCAGTGGCGAAGGCGGTTCTCTGGGCCTTTCCTGACGCTG…
b1304eaa28d8046c97bb003a180b40ad	d__Bacteria; p__Actinobacteriota; c__Actinobacteria; o__Propionibacteriales; f__Propionibacteriaceae; g__Cutibacterium	1	GCCTACGGGAGGCTGCAGTGGGGAATATTGCACAATGGGCGGAAGCCTGATGCAGCAACGCCGCGTGCGGGATGACGGCCTTCGGGTTGTAAACCGCTTTCGCCTGTGACGAAGCGTGAGTGACGGTAATGGGTAAAGAAGCACCGGCTAACTACGTGCCAGCAGCCGCGGTGATACGTAGGGTGCGAGCGTTGTCCGGATTTATTGGGCGTAAAGGGCTCGTAGGTGGTTGATCGCGTCGGAAGTGTAATCTTGGGGCTTAACCCTGAGCGTGCTTTCGATACGGGTTGACTTGAGGAAGGTAGGGGAGAATGGAATTCCTGGTGGAGCGGTGGAATGCGCAGATATCAGGAGGAACACCAGTGGCGAAGGCGGTTCTCTGGGCCTTTCCTGACGCTG…
b1d0579ee961cdff69bc2ea49abceb8a	d__Bacteria; p__Actinobacteriota; c__Actinobacteria; o__Propionibacteriales; f__Propionibacteriaceae; g__Cutibacterium	0.999999	GCCTACGGGAGGCTGCAGTGGGGAATATTGCACAATGGGCGGAAGCCTGATGCAGCAACGCCGCGTGCGGGATGACGGCCTTCGGGTTGTAAACCGCTTTCGCCTGTGACGAAGCGTGAGTGACGGTAATGGGTAAAGAAGCACCGGCTAACTACGTGCCAGCAGCCGCGGTGATACGTAGGGTGCGAGCGTTGTCCGGATTTATTGGGCGTAAAGGGCTCGTAGGTGGTTGATCGCGTCGGAAGTGTAATCTTGGGGCTTAACCCTGAGCGTGCTTTCGATACGGGTTGACTTGAGGAAGGTAGGGGAGAATGGAATTCCTGGTGGAGCGGTGGAATGCGCAGATATCAGGAGGAACACCAGTGGCGAAGGCGGTTCTCTGGGCCTTTCCTGACGCTG…
b28358e68f2b7e6c9265974e0a36180d	d__Bacteria; p__Actinobacteriota; c__Actinobacteria; o__Propionibacteriales; f__Propionibacteriaceae; g__Cutibacterium	1	TCTACGGTTGGCAGCAGTGGGGAATATTGCACAATGGGCGGAAGCCTGATGCAGCAACGCCGCGTGCGGGATGACGGCCTTCGGGTTGTAAACCGCTTTCGCCTGTGACGAAGCGTGAGTGACGGTAATGGGTAAAGAAGCACCGGCTAACTACGTGCCAGCAGCCGCGGTGATACGTAGGGTGCGAGCGTTGTCCGGATTTATTGGGCGTAAAGGGCTCGTAGGTGGTTGATCGCGTCGGAAGTGTAATCTTGGGGCTTAACCCTGAGCGTGCTTTCGATACGGGTTGACTTGAGGAAGGTAGGGGAGAATGGAATTCCTGGTGGAGCGGTGGAATGCGCAGATATCAGGAGGAACACCAGTGGCGAAGGCGGTTCTCTGGGCCTTTCCTGACGCTGA…
b406e1b857d7cf7ea6e59ddb74091a99	d__Bacteria; p__Actinobacteriota; c__Actinobacteria; o__Propionibacteriales; f__Propionibacteriaceae; g__Cutibacterium; s__Cutibacterium_acnes	0.733147	CCTGCGGGAGGCAGCAGTGGGGAATATTGCACAATGGGCGGAAGCCTGATGCAGCAACGCCGCGTGCGGGATGACGGCCTTCGGGTTGTAAACCGCTTTCGCCTGTGACGAAGCGTGAGTGACGGTAATGGGTAAAGAAGCACCGGCTAACTACGTGCCAGCAGCCGCGGTGATACGTAGGGTGCGAGCGTTGTCCGGATTTATTGGGCGTAAAGGGCTCGTAGGTGGTTGATCGCGTCGGAAGTGTAATCTTGGGGCTTAACCCTGAGCGTGCTTTCGATACGGGTTGACTTGAGGAAGGTAGGGGAGAATGGAATTCCTGGTGGAGCGGTGGAATGCGCAGATATCAGGAGGAACACCAGTGGCGAAGGCGGTTCTCTGGGCCTTTCCTGACGCTGA…
bc676dd232ceefba0da27ec319dcdd11	d__Bacteria; p__Actinobacteriota; c__Actinobacteria; o__Propionibacteriales; f__Propionibacteriaceae; g__Cutibacterium	1	GCCTACGGGAGGCTGCAGTGGGGAATATTGCACAATGGGCGGAAGCCTGATGCAGCAACGCCGCGTGCGGGATGACGGCCTTCGGGTTGTAAACCGCTTTCGCCTGTGACGAAGCGTGAGTGACGGTAATGGGTAAAGAAGCACCGGCTAACTACGTGCCAGCAGCCGCGGTGATACGTAGGGTGCGAGCGTTGTCCGGATTTATTGGGCGTAAAGGGCTCGTAGGTGGTTGATCGCGTCGGAAGTGTAATCTTGGGGCTTAACCCTGAGCGTGCTTTCGATACGGGTTGACTTGAGGAAGGTAGGGGAGAATGGAATTCCTGGTGGAGCGGTGGAATGCGCAGATATCAGGAGGAACACCAGTGGCGAAGGCGGTTCTCTGGGCCTTTCCTGACGCTG…
c004310bd9d96f354fe5477176616ef3	d__Bacteria; p__Actinobacteriota; c__Actinobacteria; o__Propionibacteriales; f__Propionibacteriaceae; g__Cutibacterium	1	CCTACGGGAGACAGCAGTGGGGAATATTGCACAATGGGCGGAAGCCTGATGCAGCAACGCCGCGTGCGGGATGACGGCCTTCGGGTTGTAAACCGCTTTCGCCTGTGACGAAGCGTGAGTGACGGTAATGGGTAAAGAAGCACCGGCTAACTACGTGCCAGCAGCCGCGGTGATACGTAGGGTGCGAGCGTTGTCCGGATTTATTGGGCGTAAAGGGCTCGTAGGTGGTTGATCGCGTCGGAAGTGTAATCTTGGGGCTTAACCCTGAGCGTGCTTTCGATACGGGTTGACTTGAGGAAGGTAGGGGAGAATGGAATTCCTGGTGGAGCGGTGGAATGCGCAGATATCAGGAGGAACACCAGTGGCGAAGGCGGTTCTCTGGGCCTTTCCTGACGCTGA…
c0e488ce1955088ab491829a72cf47cb	d__Bacteria; p__Actinobacteriota; c__Actinobacteria; o__Propionibacteriales; f__Propionibacteriaceae; g__Cutibacterium	0.999999	GCCTACGGGAGGCTGCAGTGGGGAATATTGCACAATGGGCGGAAGCCTGATGCAGCAACGCCGCGTGCGGGATGACGGCCTTCGGGTTGTAAACCGCTTTCGCCTGTGACGAAGCGTGAGTGACGGTAATGGGTAAAGAAGCACCGGCTAACTACGTGCCAGCAGCCGCGGTGATACGTAGGGTGCGAGCGTTGTCCGGATTTATTGGGCGTAAAGGGCTCGTAGGTGGTTGATCGCGTCGGAAGTGTAATCTTGGGGCTTAACCCTGAGCGTGCTTTCGATACGGGTTGACTTGAGGAAGGTAGGGGAGAATGGAATTCCTGGTGGAGCGGTGGAATGCGCAGATATCAGGAGGAACACCAGTGGCGAAGGCGGTTCTCTGGGCCTTTCCTGACGCTG…
c19082b993d93afedeffd4f89567bc6e	d__Bacteria; p__Actinobacteriota; c__Actinobacteria; o__Propionibacteriales; f__Propionibacteriaceae; g__Cutibacterium; s__Cutibacterium_granulosum	0.998357	TCCTATGGGGCGCTGCAGTGGGGAATATTGCACAATGGGCGCAAGCCTGATGCAGCAACGCCGCGTGCGGGATGACGGCCTTCGGGTTGTAAACCGCTTTCAGCAGGGACGAAGCTTTTTGTGACGGTACCTGCAGAAGAAGCACCGGCTAACTACGTGCCAGCAGCCGCGGTGATACGTAGGGTGCGAGCGTTGTCCGGATTTATTGGGCGTAAAGGGCTCGTAGGCGGTTGATCGCGTCGGAAGTGGAAACTTGATGCTTAACGTTGAGCGTGCTTTCGATACGGGTTGACTTGAGGAAGGTAGGGGAGAATGGAATTCCTGGTGGAGCGGTGGAATGCGCAGATATCAGGAGGAACACCAGTGGCGAAGGCGGTTCTCTGGACCTTTCCTGACGCT…
cd49e24727ac023e4f40e87fc1cf4d31	d__Bacteria; p__Actinobacteriota; c__Actinobacteria; o__Propionibacteriales; f__Propionibacteriaceae; g__Cutibacterium; s__Cutibacterium_acnes	0.811716	GCCTACGGGAGGCTGCAGTGGGGAATATTGCACAATGGGCGGAAGCCTGATGCAGCAACGCCGCGTGCGGGATGACGGCCTTCGGGTTGTAAACCGCTTTCGCCTGTGACGAAGCGTGAGTGACGGTAATGGGTAAAGAAGCACCGGCTAACTACGTGCCAGCAGCCGCGGTGATACGTAGGGTGCGAGCGTTGTCCGGATTTATTGGGCGTAAAGGGCTCGTAGGTGGTTGATCGCGTCGGAAGTGTAATCTTGGGGCTTAACCCTGAGCGTGCTTTCGATACGGGTTGACTTGAGGAAGGTAGGGGAGAATGGAATTCCTGGTGGAGCGGTGGAATGCGCAGATATCAGGAGGAACACCAGTGGCGAAGGCGGTTCTCTGGGCCTTTCCTGACGCTG…
cfe9e6771714c4fedcbe5008569db0e5	d__Bacteria; p__Actinobacteriota; c__Actinobacteria; o__Propionibacteriales; f__Propionibacteriaceae; g__Cutibacterium	1	GCCTACGGGAGGCTGCAGTGGGGAATATTGCACAATGGGCGGAAGCCTGATGCAGCAACGCCGCGTGCGGGATGACGGCCTTCGGGTTGTAAACCGCTTTCGCCTGTGACGAAGCGTGAGTGACGGTAATGGGTAAAGAAGCACCGGCTAACTACGTGCCAGCAGCCGCGGTGATACGTAGGGTGCGAGCGTTGTCCGGATTTATTGGGCGTAAAGGGCTCGTAGGTGGTTGATCGCGTCGGAAGTGTAATCTTGGGGCTTAACCCTGAGCGTGCTTTCGATACGGGTTGACTTGAGGAAGGTAGGGGAGAATGGAATTCCTGGTGGAGCGGTGGAATGCGCAGATATCAGGAGGAACACCAGTGGCGAAGGCGGTTCTCTGGGCCTTTCCTGACGCTG…
d78106eb717ffafe4100b5b3eafa1543	d__Bacteria; p__Actinobacteriota; c__Actinobacteria; o__Propionibacteriales; f__Propionibacteriaceae; g__Cutibacterium	1	GCCTACGGGAGGCTGCAGTGGGGAATATTGCACAATGGGCGGAAGCCTGATGCAGCAACGCCGCGTGCGGGATGACGGCCTTCGGGTTGTAAACCGCTTTCGCCTGTGACGAAGCGTGAGTGACGGTAATGGGTAAAGAAGCACCGGCTAACTACGTGCCAGCAGCCGCGGTGATACGTAGGGTGCGAGCGTTGTCCGGATTTATTGGGCGTAAAGGGCTCGTAGGTGGTTGATCGCGTCGGAAGTGTAATCTTGGGGCTTAACCCTGAGCGTGCTTTCGATACGGGTTGACTTGAGGAAGGTAGGGGAGAATGGAATTCCTGGTGGAGCGGTGGAATGCGCAGATATCAGGAGGAACACCAGTGGCGAAGGCGGTTCTCTGGGCCTTTCCTGACGCTG…
dad9b78d543efa03f38c24543a523274	d__Bacteria; p__Actinobacteriota; c__Actinobacteria; o__Propionibacteriales; f__Propionibacteriaceae; g__Cutibacterium; s__Cutibacterium_acnes	0.715507	CCTACGGGGGCCAGCAGTGGGGAATATTGCACAATGGGCGGAAGCCTGATGCAGCAACGCCGCGTGCGGGATGACGGCCTTCGGGTTGTAAACCGCTTTCGCCTGTGACGAAGCGTGAGTGACGGTAATGGGTAAAGAAGCACCGGCTAACTACGTGCCAGCAGCCGCGGTGATACGTAGGGTGCGAGCGTTGTCCGGATTTATTGGGCGTAAAGGGCTCGTAGGTGGTTGATCGCGTCGGAAGTGTAATCTTGGGGCTTAACCCTGAGCGTGCTTTCGATACGGGTTGACTTGAGGAAGGTAGGGGAGAATGGAATTCCTGGTGGAGCGGTGGAATGCGCAGATATCAGGAGGAACACCAGTGGCGAAGGCGGTTCTCTGGGCCTTTCCTGACGCTGA…
fce86fa2f8ede797be9164a971d25889	d__Bacteria; p__Actinobacteriota; c__Actinobacteria; o__Propionibacteriales; f__Propionibacteriaceae; g__Cutibacterium	1	GCCTACGGGAGGCTGCAGTGGGGAATATTGCACAATGGGCGGAAGCCTGATGCAGCAACGCCGCGTGCGGGATGACGGCCTTCGGGTTGTAAACCGCTTTCGCCTGTGACGAAGCGTGAGTGACGGTAATGGGTAAAGAAGCACCGGCTAACTACGTGCCAGCAGCCGCGGTGATACGTAGGGTGCGAGCGTTGTCCGGATTTATTGGGCGTAAAGGGCTCGTAGGTGGTTGATCGCGTCGGAAGTGTAATCTTGGGGCTTAACCCTGAGCGTGCTTTCGATACGGGTTGACTTGAGGAAGGTAGGGGAGAATGGAATTCCTGGTGGAGCGGTGGAATGCGCAGATATCAGGAGGAACACCAGTGGCGAAGGCGGTTCTCTGGGCCTTTCCTGACGCTG…

## Sheet: Helicobacter_representative_sq
Feature-ID	Taxon	Confidence	Sequence
1e01323736a9cbec48ea075f80ed6057	d__Bacteria; p__Campilobacterota; c__Campylobacteria; o__Campylobacterales; f__Helicobacteraceae; g__Helicobacter	1	CCTACGGGTGGCAGCAGTAGGGAATATTGCTCAATGGGGGAAACCCTGAAGCAGCAACGCCGCGTGGAGGATGAAGGTTTTAGGATTGTAAACTCCTTTTGTTAGAGAAGATAATGACGGTATCTAACGAATAAGCACCGGCTAACTCCGTGCCAGCAGCCGCGGTAATACGGAGGGTGCAAGCGTTACTCGGAATCACTGGGCGTAAAGAGCGCGTAGGCGGGATAGTCAGTCAGGTGTGAAATCCTATGGCTTAACCATAGAACTGCATTTGAAACTACTATTCTAGAGTGTGGGAGAGGTAGGTGGAATTCTTGGTGTAGGGGTAAAATCCGTAGAGATCAAGAGGAATACTCATTGCGAAGGCGACCTGCTGGAACATTACTGACGCTGATTGCG…
3802a181cd3c5bd41707f73102dbd2c2	d__Bacteria; p__Campilobacterota; c__Campylobacteria; o__Campylobacterales; f__Helicobacteraceae; g__Helicobacter	1	CCTACGGGTGGCTGCAGTAGGGAATATTGCTCAATGGGGGAAACCCTGAAGCAGCAACGCCGCGTGGAGGATGAAGGTTTTAGGATTGTAAACTCCTTTTGTTAGAGAAGATAATGACGGTATCTAACGAATAAGCACCGGCTAACTCCGTGCCAGCAGCCGCGGTAATACGGAGGGTGCAAGCGTTACTCGGAATCACTGGGCGTAAAGAGCGCGTAGGCGGGATAGTCAGTCAGGTGTGAAATCCTATGGCTTAACCATAGAACTGCATTTGAAACTACTATTCTAGAGTGTGGGAGAGGTAGGTGGAATTCTTGGTGTAGGGGTAAAATCCGTAGAGATCAAGAGGAATACTCATTGCGAAGGCGACCTGCTGGAACATTACTGACGCTGATTGCG…
422d49936ea2386024e25b98708eedff	d__Bacteria; p__Campilobacterota; c__Campylobacteria; o__Campylobacterales; f__Helicobacteraceae; g__Helicobacter	1	CCTACGGGTGGCAGCAGTAGGGAATATTGCTCAATGGGGGAAACCCTGAAGCAGCAACGCCGCGTGGAGGATGAAGGTTTTAGGATTGTAAACTCCTTTTGTTAGAGAAGATAATGACGGTATCTAACGAATAAGCACCGGCTAACTCCGTGCCAGCAGCCGCGGTAATACGGAGGGTGCAAGCGTTACTCGGAATCACTGGGCGTAAAGAGCGCGTAGGCGGGATAGTCAGTCAGGTGTGAAATCCTATGGCTTAACCATAGAACTGCATTTGAAACTACTATTCTAGAGTGTGGGAGAGGTAGGTGGAATTCTTGGTGTAGGGGTAAAATCCGTAGAGATCAAGAGGAATACTCATTGCGAAGGCGACCTGCTGGAACATTACTGACGCTGATTGCG…
50b5dce544b51d9154d2142af1126208	d__Bacteria; p__Campilobacterota; c__Campylobacteria; o__Campylobacterales; f__Helicobacteraceae; g__Helicobacter	1	CCTACGGGTGGCTGCAGTAGGGAATATTGCTCAATGGGGGAAACCCTGAAGCAGCAACGCCGCGTGGAGGATGAAGGTTTTAGGATTGTAAACTCCTTTTGTTAGAGAAGATAATGACGGTATCTAACGAATAAGCACCGGCTAACTCCGTGCCAGCAGCCGCGGTAATACGGAGGGTGCAAGCGTTACTCGGAATCACTGGGCGTAAAGAGCGCGTAGGCGGGATAGTCAGTCAGGTGTGAAATCCTATGGCTTAACCATAGAACTGCATTTGAAACTACTATTCTAGAGTGTGGGAGAGGTAGGTGGAATTCTTGGTGTAGGGGTAAAATCCGTAGAGATCAAGAGGAATACTCATTGCGAAGGCGACCTGCTGGAACATTACTGACGCTGATTGCG…
74a3b75f57fc7774e4cb9f83966d0ade	d__Bacteria; p__Campilobacterota; c__Campylobacteria; o__Campylobacterales; f__Helicobacteraceae; g__Helicobacter	1	CCTACGGGTGGCTGCAGTAGGGAATATTGCTCAATGGGGGAAACCCTGAAGCAGCAACGCCGCGTGGAGGATGAAGGTTTTAGGATTGTAAACTCCTTTTGTTAGAGAAGATAATGACGGTATCTAACGAATAAGCACCGGCTAACTCCGTGCCAGCAGCCGCGGTAATACGGAGGGTGCAAGCGTTACTCGGAATCACTGGGCGTAAAGAGCGCGTAGGCGGGATAGTCAGTCAGGTGTGAAATCCTATGGCTTAACCATAGAACTGCATTTGAAACTACTATTCTAGAGTGTGGGAGAGGTAGGTGGAATTCTTGGTGTAGGGGTAAAATCCGTAGAGATCAAGAGGAATACTCATTGCGAAGGCGACCTGCTGGAACATTACTGACGCTGATTGCG…
7c9fee89d55a31226ecfa1f8ac89961a	d__Bacteria; p__Campilobacterota; c__Campylobacteria; o__Campylobacterales; f__Helicobacteraceae; g__Helicobacter	1	CCTACGGGTGGCTGCAGTAGGGAATATTGCTCAATGGGGGAAACCCTGAAGCAGCAACGCCGCGTGGAGGATGAAGGTTTTAGGATTGTAAACTCCTTTTGTTAGAGAAGATAATGACGGTATCTAACGAATAAGCACCGGCTAACTCCGTGCCAGCAGCCGCGGTAATACGGAGGGTGCAAGCGTTACTCGGAATCACTGGGCGTAAAGAGCGCGTAGGCGGGATAGTCAGTCAGGTGTGAAATCCTATGGCTTAACCATAGAACTGCATTTGAAACTACTATTCTAGAGTGTGGGAGAGGTAGGTGGAATTCTTGGTGTAGGGGTAAAATCCGTAGAGATCAAGAGGAATACTCATTGCGAAGGCGACCTGCTGGAACATTACTGACGCTGATTGCG…
8edacf144cdbda9b05dec822b3154c7e	d__Bacteria; p__Campilobacterota; c__Campylobacteria; o__Campylobacterales; f__Helicobacteraceae; g__Helicobacter	1	CCTACGGGTGGCTGCAGTAGGGAATATTGCTCAATGGGGGAAACCCTGAAGCAGCAACGCCGCGTGGAGGATGAAGGTTTTAGGATTGTAAACTCCTTTTGTTAGAGAAGATAATGACGGTATCTAACGAATAAGCACCGGCTAACTCCGTGCCAGCAGCCGCGGTAATACGGAGGGTGCAAGCGTTACTCGGAATCACTGGGCGTAAAGAGCGCGTAGGCGGGATAGTCAGTCAGGTGTGAAATCCTATGGCTTAACCATAGAACTGCATTTGAAACTACTATTCTAGAGTGTGGGAGAGGTAGGTGGAATTCTTGGTGTAGGGGTAAAATCCGTAGAGATCAAGAGGAATACTCATTGCGAAGGCGACCTGCTGGAACATTACTGACGCTGATTGCG…
bf3fc7ea50f2e3704fd670168a12f441	d__Bacteria; p__Campilobacterota; c__Campylobacteria; o__Campylobacterales; f__Helicobacteraceae; g__Helicobacter	1	CTTACGAGGCGCAGCAGTAGGGAATATTGCTCAATGGGGGAAACCCTGAAGCAGCAACGCCGCGTGGAGGATGAAGGTTTTAGGATTGTAAACTCCTTTTGTTAGAGAAGATAATGACGGTATCTAACGAATAAGCACCGGCTAACTCCGTGCCAGCAGCCGCGGTAATACGGAGGGTGCAAGCGTTACTCGGAATCACTGGGCGTAAAGAGCGCGTAGGCGGGATAGTCAGTCAGGTGTGAAATCCTATGGCTTAACCATAGAACTGCATTTGAAACTACTATTCTAGAGTGTGGGAGAGGTAGGTGGAATTCTTGGTGTAGGGGTAAAATCCGTAGAGATCAAGAGGAATACTCATTGCGAAGGCGACCTGCTGGAACATTACTGACGCTGATTGCG…
c1d5fb3b43026829f06cfb3fd4263290	d__Bacteria; p__Campilobacterota; c__Campylobacteria; o__Campylobacterales; f__Helicobacteraceae; g__Helicobacter	1	CCTACGGGTGGCTGCAGTAGGGAATATTGCTCAATGGGGGAAACCCTGAAGCAGCAACGCCGCGTGGAGGATGAAGGTTTTAGGATTGTAAACTCCTTTTGTTAGAGAAGATAATGACGGTATCTAACGAATAAGCACCGGCTAACTCCGTGCCAGCAGCCGCGGTAATACGGAGGGTGCAAGCGTTACTCGGAATCACTGGGCGTAAAGAGCGCGTAGGCGGGATAGTCAGTCAGGTGTGAAATCCTATGGCTTAACCATAGAACTGCATTTGAAACTACTATTCTAGAGTGTGGGAGAGGTAGGTGGAATTCTTGGTGTAGGGGTAAAATCCGTAGAGATCAAGAGGAATACTCATTGCGAAGGCGACCTGCTGGAACATTACTGACGCTGATTGCG…
c9ae5c4c177da1563f5de21acebd9946	d__Bacteria; p__Campilobacterota; c__Campylobacteria; o__Campylobacterales; f__Helicobacteraceae; g__Helicobacter	1	CCTACGGGAGACAGCAGTAGGGAATATTGCTCAATGGGGGAAACCCTGAAGCAGCAACGCCGCGTGGAGGATGAAGGTTTTAGGATTGTAAACTCCTTTTGTTAGAGAAGATAATGACGGTATCTAACGAATAAGCACCGGCTAACTCCGTGCCAGCAGCCGCGGTAATACGGAGGGTGCAAGCGTTACTCGGAATCACTGGGCGTAAAGAGCGCGTAGGCGGGATAGTCAGTCAGGTGTGAAATCCTATGGCTTAACCATAGAACTGCATTTGAAACTACTATTCTAGAGTGTGGGAGAGGTAGGTGGAATTCTTGGTGTAGGGGTAAAATCCGTAGAGATCAAGAGGAATACTCATTGCGAAGGCGACCTGCTGGAACATTACTGACGCTGATTGCG…
f131cc9dc54b18f41041c3e17ea9882c	d__Bacteria; p__Campilobacterota; c__Campylobacteria; o__Campylobacterales; f__Helicobacteraceae; g__Helicobacter	1	CCTACGGGGGCCAGCAGTAGGGAATATTGCTCAATGGGGGAAACCCTGAAGCAGCAACGCCGCGTGGAGGATGAAGGTTTTAGGATTGTAAACTCCTTTTGTTAGAGAAGATAATGACGGTATCTAACGAATAAGCACCGGCTAACTCCGTGCCAGCAGCCGCGGTAATACGGAGGGTGCAAGCGTTACTCGGAATCACTGGGCGTAAAGAGCGCGTAGGCGGGATAGTCAGTCAGGTGTGAAATCCTATGGCTTAACCATAGAACTGCATTTGAAACTACTATTCTAGAGTGTGGGAGAGGTAGGTGGAATTCTTGGTGTAGGGGTAAAATCCGTAGAGATCAAGAGGAATACTCATTGCGAAGGCGACCTGCTGGAACATTACTGACGCTGATTGCG…
