# Supplementary material for: Dysbiosis by Eradication of Helicobacter pylori Infection Associated with Follicular Gastropathy and Pangastropathy
Source: Microorganisms. 2023 Nov 10;11(11):2748. doi: 10.3390/microorganisms11112748 (PMC10673246; doi:10.3390/microorganisms11112748)
Supplement: Supplementary file 1 [file microorganisms-11-02748-s001.zip › qRT-PCR data.xlsx]

## Sheet: C. acnes standard curve
Standard conditions of Cutibacterium acnes
cDNA (ng/uL)	log(ng/uL)	Cq		Efficiency
300	2.47712	21.92		Slope	-3.1724
150	2.17609	23.61		E	1.06642
75	1.87506	25.28		%E	106.642
37.5	1.57403	25.4
18.75	1.273	26.16
9.375	0.971971	27.91
4.6875	0.670941	28.8

## Sheet: H. pylori standard curve
Standard conditions of Helicobacter pylori
cDNA (ng/uL)	log(ng/uL)	Cq		Efficiency
100	2	10.17		Slope	-3.269
10	1	13.41		E	1.02257
1	0	17.27		%E	102.257
0.1	-1	19.78

## Sheet: FFPE-data
Patient	Pathology	Cutibacterium acnes						Helicobacter pylori
		Cq	ng cDNA	log(ng cDNA)	Number of molecules	log(Number of molecules)	Relative abundance	Cq	ng cDNA	log(ng cDNA)	Number of molecules	log(Number of molecules)	Relative abundance
Patient 1	Gastritis	27.21	13.0485	1.11556	9.45649e+07	7.97573	100	26.3	-	-	-	0	0
Patient 2	Gastritis	29.33	2.80089	0.447295	3.95493e+08	8.59714	100	25.32	-	-	-	0	0
Patient 3	Gastritis	24.85	72.3562	1.85948	1.92297e+07	7.28397	100	24.68	-	-	-	0	0
Patient 4	Gastritis	29.88	1.87899	0.273925	5.73263e+08	8.75835	100	25.56	-	-	-	0	0
Patient 5	Gastritis	28.52	5.04223	0.702623	2.28936e+08	8.35971	100	25.38	-	-	-	0	0
Patient 6	Gastritis	27.97	7.51611	0.875993	1.57943e+08	8.1985	100	25.1	-	-	-	0	0
Patient 7	Gastropathy	25.04	63.0353	1.79958	2.18607e+07	7.33966	100	24.85	-	-	-	0	0
Patient 8	Non-significant alterations	29.01	3.53318	0.548165	3.1867e+08	8.50334	100	25.84	-	-	-	0	0
Patient 9	Gastritis	27.11	14.0308	1.14708	8.83931e+07	7.94642	100	26.88	-	-	-	0	0
Patient 10	Gastritis	25.63	41.0776	1.6136	3.2554e+07	7.5126	100	26.81	-	-	-	0	0
Patient 11	Gastritis	25.57	42.906	1.63252	3.1262e+07	7.49502	100	26.8	-	-	-	0	0
Patient 12	Gastritis	28.79	4.1449	0.617514	2.74698e+08	8.43886	100	27.11	-	-	-	0	0
Patient 13	Gastritis	27.3	12.2233	1.08719	1.00487e+08	8.00211	100	28.44	-	-	-	0	0
Patient 14	Gastritis	28.87	3.91107	0.592296	2.89938e+08	8.46231	100	27.55	-	-	-	0	0
Patient 15	Gastritis	28.78	4.17509	0.620666	2.7285e+08	8.43592	100	27.15	-	-	-	0	0
Patient 16	Gastritis	28.53	5.00576	0.69947	2.30486e+08	8.36265	100	27.91	-	-	-	0	0
Patient 17	Gastritis	27.26	12.5834	1.0998	9.78106e+07	7.99039	100	-	-	-	-	0	0
Patient 18	Gastritis	28.53	5.00576	0.69947	2.30486e+08	8.36265	100	-	-	-	-	0	0
Patient 19	Non-significant alterations	28.53	5.00576	0.69947	2.30486e+08	8.36265	100	-	-	-	-	0	0
Patient 20	Non-significant alterations	28.28	6.00171	0.778275	1.947e+08	8.28937	100	-	-	-	-	0	0
Patient 21	Non-significant alterations	28.34	5.74595	0.759362	2.02746e+08	8.30695	100	-	-	-	-	0	0
Patient 22	Non-significant alterations	28.47	5.22858	0.718384	2.21339e+08	8.34506	100	-	-	-	-	0	0
Patient 23	Gastritis	27.95	7.62601	0.882297	1.55825e+08	8.19264	100	-	-	-	-	0	0
Patient 24	Gastropathy	26.21	26.9636	1.43078	4.81518e+07	7.68261	99.9732	13.44	10.6021	1.02539	12922.6	4.11135	0.02683
Patient 25	Gastropathy	25.8	36.3093	1.56002	3.65119e+07	7.56243	99.956	13.75	8.52236	0.93056	16076	4.20618	0.0440103
Patient 26	Gastropathy	24.25	111.842	2.04861	1.28263e+07	7.1081	99.947	12.53	20.1262	1.30376	6807.32	3.83298	0.053045
Patient 27	Gastropathy	24.66	83.0552	1.91937	1.69153e+07	7.22828	99.944	13	14.454	1.15999	9478.76	3.97675	0.0560051
Patient 28	Gastropathy	23.62	176.683	2.24719	8.38374e+06	6.92344	99.8644	13.26	12.0352	1.08045	11383.8	4.05629	0.1356
Patient 29	Gastropathy	33	-	-	-	0	0	13.4	10.905	1.03763	12563.6	4.09911	100
Patient 30	Intestinal metaplasia	30.69	1.04375	0.0185979	9.90328e+08	8.99578	100	-	-	-	-	0	0
Patient 31	Intestinal metaplasia	31.19	-	-0.139011	-	0	0	27.87	-	-3.3888	-	0	0
Patient 32	Intestinal metaplasia	31.19	-	-0.139011	-	0	0	27.58	-	-3.30009	-	0	0
Patient 33	Intestinal metaplasia	31.17	-	-0.132707	-	0	0	28.3	-	-3.52034	-	0	0
Patient 34	Intestinal metaplasia	31.5	-	-0.236729	-	0	0	-	-	-	-	0	0
Patient 35	Intestinal metaplasia	32.31	-	-	-	0	0	-	-	-	-	0	0
Patient 36	Intestinal metaplasia	31.75	-	-	-	0	0	-	-	-	-	0	0
Patient 37	Intestinal metaplasia	32.22	-	-	-	0	0	-	-	-	-	0	0
Patient 38	Intestinal metaplasia	31.91	-	-	-	0	0	-	-	-	-	0	0
Patient 39	Intestinal metaplasia	31.87	-	-	-	0	0	-	-	-	-	0	0
Patient 40	Intestinal metaplasia	32.03	-	-	-	0	0	-	-	-	-	0	0
